# Supplementary material for: First supramolecular sensors for phosphonate anions
Source: Royal Society of Chemistry journal article supplement (doi:10.1039/c3sc51407b), 2013-01-01
Supplement: c3sc51407b.pdf [file c3sc51407b.pdf]

## Supporting Information

# First Supramolecular Sensors for Phosphonate Anions

Nina A. Esipenko,<sup>a</sup> Petr Koutnik,<sup>a</sup> Tsuyoshi Minami,<sup>a</sup> Lorenzo Mosca,<sup>a</sup> Vincent M. Lynch,<sup>b</sup>  
Grigory V. Zyryanov<sup>a</sup> and Pavel Anzenbacher Jr.\*<sup>a</sup>

<sup>a</sup> Department of Chemistry, Bowling Green State University, Bowling Green, Ohio 43403, USA.  
Fax: 419-372-9098; Tel: 419-372-2080; E-mail: pavel@bgsu.edu

<sup>b</sup> Department of Chemistry and Biochemistry, The University of Texas at Austin, Austin, TX,  
USA.

### Contents:

|                                                                             |     |
|-----------------------------------------------------------------------------|-----|
| General                                                                     | S2  |
| Synthesis                                                                   | S4  |
| NMR Spectra                                                                 | S9  |
| X-ray structural analysis                                                   | S19 |
| Solution behavior by Variable Temperature NMR                               | S22 |
| Examples of <sup>1</sup> H NMR titration                                    | S22 |
| MALDI and Electrospray mass-spectrometric studies of sensor-anion complexes | S27 |
| Job-Plot Experiments                                                        | S29 |
| Photophysical studies and fluorimetric titrations                           | S30 |
| Linear Discriminant Analysis of qualitative assay                           | S40 |
| Supporting information references                                           | S46 |

## General

All syntheses were carried out under dry argon atmosphere using standard laboratory techniques.  $^1\text{H}$ - and  $^{13}\text{C}$ -NMR spectra were recorded on Bruker Avance III spectrometer at 500 MHz or 125 MHz, respectively at 25 °C with or without tetramethylsilane (TMS) as an internal reference. The chemical shifts ( $\delta$ , ppm) are referenced to the respective solvent or TMS and splitting patterns are designated as s (singlet), d (doublet), t (triplet), q (quartet), m (multiplet), and bs (broad singlet). MALDI-TOF MS spectra were recorded using a Bruker Daltonics Omnixflex spectrometer using dithranol or  $\alpha$ -cyano-4-hydroxycinnamic acid as matrices. Electrospray Ionization (ESI) experiments were carried out using a Shimadzu 2010A LCMS instrument. Emission spectra were acquired at an Edinburgh single-photon counting spectrofluorometer FLSP 920 (Edinburgh Instruments Ltd, Livingston, U.K.). The spectra were obtained at room temperature using a quartz cuvette with a path length of 1 cm at right angle detection. The absorbance of all samples used for fluorescence studies were equal to or below 0.1. Absolute quantum yields were measured with a Hamamatsu absolute quantum yield spectrometer (Quantaaurus-QY C11347, 150 W xenon lamp and multichannel detector/CCD sensor).

Column chromatography was performed on commercially available bulk flash silica gel 32-63u (Dynamic Adsorbents Inc., Norcross, GA, U.S.A.). Preparative thin-layer chromatography (TLC) was carried out on the Uniplate preparative silica gel TLC plates 2 mm, 20 × 20 cm with UV254 fluorescent dye (Analtech Inc., Newark, DE, U.S.A). 2-(trichloroacetyl)pyrrole was purchased from Aldrich, 4-(dimethylamino)-1 naphthyl-isothiocyanate from TCI America, 4-(phenanthro[9,10*d*]oxazol-2-yl)phenyl-isothiocyanate from Fluka, and the 4-tolylisothiocyanate was purchased from Acros Organics. All other reactants and reagents used in the syntheses were purchased from Aldrich, Fluka, or TCI America. The solvents methanol [(MeOH), *N,N*-dimethylformamide (DMF), diethylether (Et<sub>2</sub>O), chloroform (CHCl<sub>3</sub>), dichloromethane (DCM), and ethylacetate (EtOAc)] were purchased from EMD and used as received unless stated otherwise. All chemicals were used as received redundant. Tetrahydrofuran (THF) was distilled over Na/K alloy. Anhydrous dimethylsulfoxide (DMSO) was obtained using 4Å molecular sieves.

The array experiment was performed in 1536-well plates. The DMSO solutions of sensors were dispensed manually using Gilson micropipettes. Aqueous solutions of analytes were contact-free dispensed using BioRAPTR microfluidic robotic dispenser at 200 nL/s as follows. Each

experiment was performed in 24 repetitions. Each well received 6.3  $\mu\text{l}$  of the sensor solution (10  $\mu\text{M}$ ) in DMSO, followed by 0.7  $\mu\text{l}$  of the analyte solution (3 mM) in water. This way, final amount of water in DMSO is 10% (v/v). For control experiment, 0.7  $\mu\text{l}$  of water was added instead of analyte solution. After the analyte solution was dispensed, the plate was centrifuged (2 min, 2500 rpm, 21  $^{\circ}\text{C}$ ) and immediately read by a BMG PheraStar microplate reader using excitation at 450 nm, emission at 520 nm for **4** and **8**, excitation at 450 nm, emission at 550 nm for **6**, and excitation at 300 nm, emission at 450 nm for **5** and **7**. The resulting emission data were subjected to the student T-test to exclude 4 data-points (of 24 repetitions). The coefficient of variability among the data within the class of 20 repetitions was lower than 3%. Thus obtained data for qualitative analysis were then analyzed using LDA without any further pretreatment.

## Synthesis

Structures **1**, **2**, **3**, **6** and **8** were prepared according to published procedure. All analytical data were in an agreement with the published data.<sup>1,2</sup>

### *N,N'*-(5-(aminomethyl)-2,4,6-triethyl-1,3-phenylene)bis(methylene)bis(1*H*-pyrrole-2-carboxamide) (**9**)

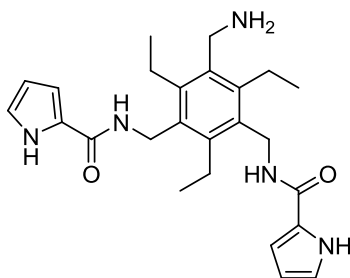

1,3,5-Tris(aminomethyl)-2,4,6-triethylbenzene (211 mg, 0.80 mmol) and 2-(trichloroacetyl)pyrrole (344 mg, 1.6 mmol) were dissolved in freshly distilled tetrahydrofuran (THF) in a vial. The vial was flushed with argon and screw-capped and the mixture was stirred at room temperature for 16 hours. The THF was then evaporated /co-distilled with toluene using a rotary evaporator and the white residue was dried *in vacuo*. Column chromatography (silica, 70 g, DCM/MeOH, 9 : 1 v/v,  $R_f = 0.14$ , isocratic elution) afforded product **9** (231 mg, 63 %). <sup>1</sup>H NMR (500 MHz, DMSO-*d*<sub>6</sub>):  $\delta = 11.45$  (s, 2 H, HetNH), 7.84 (t,  $J = 4.5$  Hz, 2 H, CONH), 6.83-6.82 (m, 4 H, HetH), 6.04-6.03 (m, 2 H, HetH), 4.48 (d,  $J = 4.5$  Hz, 4 H, ArCH<sub>2</sub>NH), 3.80 (s, 2 H, CH<sub>2</sub>NH<sub>2</sub>), 2.82-2.77 (m, 6 H, CH<sub>2</sub>CH<sub>3</sub>), 1.15-1.10 (m, 9 H, CH<sub>2</sub>CH<sub>3</sub>). <sup>13</sup>C-<sup>1</sup>H NMR (125 MHz, DMSO-*d*<sub>6</sub>):  $\delta = 160.3, 143.0, 142.6, 135.6, 132.1, 126.1, 121.2, 110.7, 108.5, 38.6, 37.1, 22.7, 22.3, 16.5, 16.3$ . MS (MALDI-TOF):  $m/z = 458.28$ ,  $[M+Na]^+$  calcd. for C<sub>25</sub>H<sub>33</sub>N<sub>5</sub>NaO<sub>2</sub> 458.25.

**1,1',1''-(2,4,6-Triethylbenzene-1,3,5-triyl)tris(methylene)tris(3-(2-benzyl-1,3-dioxo-2,3-dihydro-1*H*-benzo[*de*]isoquinolin-6-yl)thiourea) (4)**

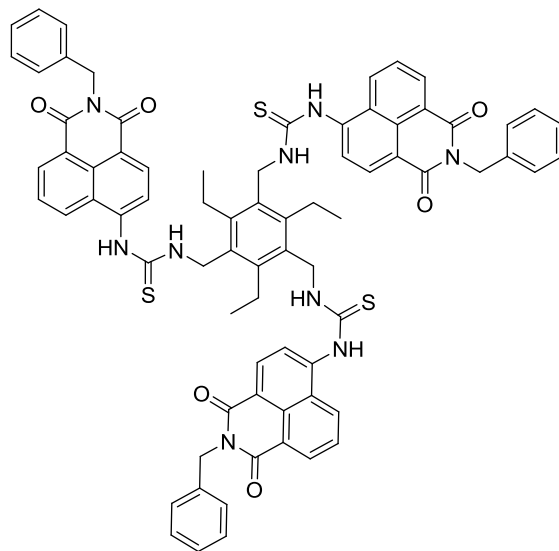

2-Benzyl-6-isothiocyanato-1*H*-benzo[*de*]isoquinoline-1,3(2*H*)-dione (300 mg, 0.87 mmol) was added to a tetrahydrofuran solution (100 mL) of 1,3,5-tris(aminomethyl)-2,4,6-triethylbenzene (48.3 mg, 0.19 mmol). The reaction mixture was stirred for 2 days at room temperature. The solvent was evaporated, and the residue was chromatographed on a silica using gradient of ethanol (0-10%, v/v) in chloroform as an eluent. 124 mg (50 %) of the **4** were obtained. M.p. > 175 °C (dec.). <sup>1</sup>H NMR (DMSO-*d*<sub>6</sub>, 500 MHz): δ = 1.27 (t, *J* = 7.3 Hz, 9 H, CH<sub>2</sub>CH<sub>3</sub>), 2.88-2.89 (m, 6 H, CH<sub>2</sub>CH<sub>3</sub>), 4.87 (s, 6 H, ArCH<sub>2</sub>NH), 5.25 (s, 6 H, ArCH<sub>2</sub>), 7.22 (t, *J* = 7.3 Hz, 3 H, Ar*H*), 7.28 (t, *J* = 7.5 Hz, 6 H, Ar*H*), 7.33-7.35 (m, 6 H, Ar*H*), 7.89 (t, *J* = 8.0 Hz, 3 H, Ar*H*), 8.39 (bs, 3 H, CSNH), 8.47-8.54 (m, 12 H, Ar*H*), 10.08 (bs, 3 H, CSNH). <sup>13</sup>C-<sup>1</sup>H} NMR (125 MHz, DMSO-*d*<sub>6</sub>): δ = 16.5, 23.12, 42.7, 42.9, 117.6, 122.2, 122.3, 125.9, 126.8, 127.1, 127.5, 128.4, 128.5, 128.9, 131.2, 131.4, 131.9, 137.4, 142.0, 144.4, 163.0, 163.6, 180.8. MS (MALDI-TOF): *m/z* = 1304.35, [*M*+Na]<sup>+</sup> calcd. for C<sub>75</sub>H<sub>63</sub>N<sub>9</sub>NaO<sub>6</sub>S<sub>3</sub> 1304.40.

**1,1',1''-(2,4,6-triethylbenzene-1,3,5-triyl)tris(methylene)tris(3-(4-(dimethylamino) naphthalene-1-yl)thiourea) (5)**

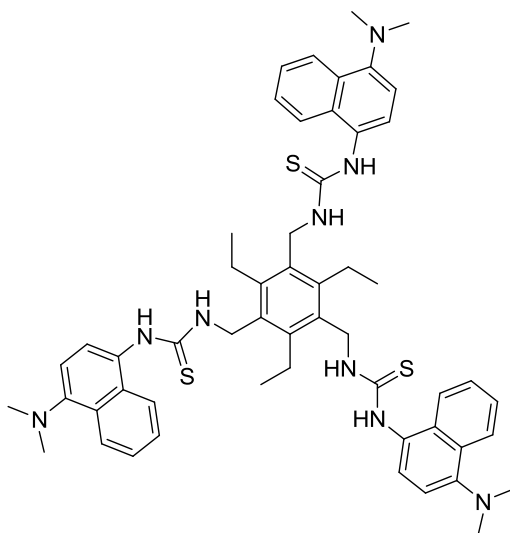

To a solution of 1,3,5-tris(aminomethyl)-2,4,6-triethylbenzene (53.8 mg, 0.22 mmol) in 7 ml of anhydrous THF in a vial (20 mL) under magnetic stirring, a solution of 4-(*N,N*-dimethylamino)naphthalenethiocyanate (257 mg, 1.1 mmol) in THF was added dropwise over 10 minutes. The vial was flushed with argon, screw-capped and covered with aluminum foil as the mixture was stirred at room temperature for 36 hours. The THF was then evaporated and the residue chromatographed on silica (25 g, toluene-acetone, 9 : 1 v/v, isocratic elution,  $R_f = 0.41$  in toluene-acetone, 8 : 2 v/v). The product was isolated as a pale yellow solid (115 mg, 57 %). M.p. > 181 °C (dec.).  $^1\text{H}$  NMR (DMSO- $d_6$ , 500 MHz):  $\delta = 9.32$  (bs, 3 H, CSNHAr), 8.18-8.16 (m, 3 H, ArH), 7.86-7.84 (m, 3 H, ArH), 7.56-7.51 (m, 6 H, ArH), 7.47 (d,  $J = 7.8$  Hz, 3 H, ArH), 7.43 (bs, 3 H, CSNHCH<sub>2</sub>), 7.10 (d,  $J = 8.1$  Hz, 3 H, ArH), 4.76 (bs, 6 H, ArCH<sub>2</sub>NH), 2.81 (comp, 24 H, NCH<sub>3</sub> + CH<sub>2</sub>CH<sub>3</sub>), 1.15 (t,  $J = 7.1$  Hz, 9 H, CH<sub>2</sub>CH<sub>3</sub>).  $^{13}\text{C}$ -{ $^1\text{H}$ } NMR (125 MHz, DMSO- $d_6$ ):  $\delta = 182.3, 149.2, 144.1, 132.2, 131.0, 129.6, 126.0, 125.5, 125.3, 124.2, 123.1, 113.6, 44.9, 42.8, 22.8, 16.5$ . MS (MALDI-TOF):  $m/z = 933.74$ ,  $[M]^+$  calcd. for C<sub>54</sub>H<sub>63</sub>N<sub>9</sub>S<sub>3</sub> 933.44.

***N,N'*-(5-((3-(4-(Dimethylamino)naphthalen-1-yl)thioureido)methyl)-2,4,6-triethyl-1,3-phenylene)bis(methylene)bis(1*H*-pyrrole-2-carboxamide) (7)**

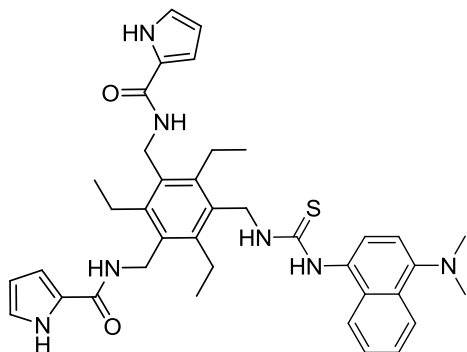

4-(*N,N*-Dimethylamino)naphthalenisothiocyanate (32.1 mg, 0.14 mmol) was added in one portion to the solution of **9** (31.6 mg, 0.069 mmol) in 10 mL of freshly distilled THF upon stirring. The vial was flushed with argon, screw-capped and the mixture was stirred at room temperature for 15 hours. The white precipitate was filtered off using a paper filter, rinsed with THF and dried *in vacuo*. Compound **7** was isolated as a white powder (14 mg, 30 %). M.p. > 245 °C. <sup>1</sup>H NMR (500 MHz, DMSO-*d*<sub>6</sub>): δ = 11.46 (bs, 2 H, HetNH), 9.37 (bs, 1 H, CSNH), 8.15-8.13 (m, 1 H, ArH), 7.87 (t, *J* = 4.6 Hz, 2 H, HetH), 7.82 (d, *J* = 7.3 Hz, 1 H, ArH), 7.52-7.46 (m, 2 H, ArH), 7.44 (d, *J* = 8.0 Hz, 1 H, ArH), 7.24 (bs, 1 H, CSNH), 7.07 (d, *J* = 8.1 Hz, 1 H, ArH), 6.86-6.78 (m, 4 H, HetH), 6.05-6.04 (m, 2 H, HetH), 4.74 (d, *J* = 3.7 Hz, 2 H, ArCH<sub>2</sub>NH), 4.50 (d, *J* = 4.5 Hz, 4 H, ArCH<sub>2</sub>NH), 2.86-2.76 (m, 12 H, CH<sub>2</sub>CH<sub>3</sub>, NCH<sub>3</sub>), 1.15-1.09 (m, 9 H, CH<sub>2</sub>CH<sub>3</sub>). <sup>13</sup>C-<sup>1</sup>H NMR (125 MHz, DMSO-*d*<sub>6</sub>): δ = 182.1, 160.3, 149.2, 144.1, 143.5, 132.6, 132.0, 131.0, 130.6, 128.5, 126.1, 125.4, 125.3, 124.2, 123.1, 121.3, 113.6, 110.6, 108.6, 44.9, 42.8, 37.0, 34.4, 22.7, 16.4, 16.3. MS (MALDI-TOF): *m/z* = 631.36, [*M-S*]<sup>+</sup> calcd. for C<sub>38</sub>H<sub>47</sub>N<sub>7</sub>O<sub>2</sub> 631.87.

***N,N'*-(5-((3-(2-benzyl-1,3-dioxo-2,3-dihydro-1*H*-benzo[*de*]isoquinolin-6-yl)thioureido)methyl)-2,4,6-triethyl-1,3-phenylene)bis(methylene)bis(1*H*-pyrrole-2-carboxamide) (8)**

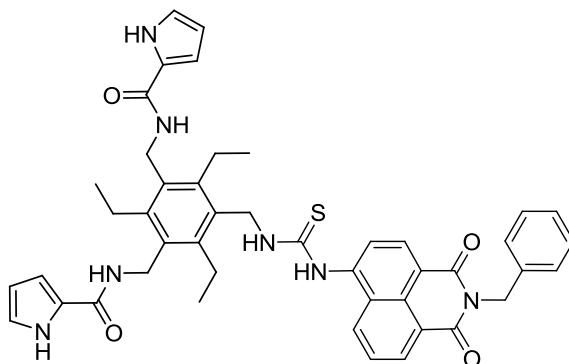

The 2-benzyl-6-isothiocyanato-1*H*-benzo[*de*]isoquinoline-1,3(2*H*)-dione (6.6 mg, 0.014 mmol) and **9** (5.2 mg, 0.014 mmol) were dissolved in freshly distilled THF in a vial. The vial was flushed with argon, screw-capped and covered with aluminum foil. The mixture was stirred at room temperature for 15 minutes. The solvent was then evaporated on a rotary evaporator and the residue was chromatographed on preparative TLC (silica, 2 mm, 20 × 20 cm, DCM/MeOH, 95 : 5 v/v,  $R_f = 0.26$ ) and the product was isolated by extraction of the scraped silica layer into THF. Evaporation of THF afforded product **8** as a yellow solid (3.2 mg, 24 %). M.p. > 170 °C (dec.).  $^1\text{H}$  NMR (500 MHz, DMSO- $d_6$ ):  $\delta = 11.51$ -11.43 (m, 2 H, HetNH), 10.14-10.06 (m, 1 H, CSNH), 8.54-8.46 (m, 4 H, ArH), 8.36 (m, 1 H, CSNH), 7.90-7.87 (m, 3 H, HetH), 7.35-7.21 (comp, 5 H, ArH), 6.85-6.82 (comp, 4 H, HetH), 6.05-6.03 (m, 2 H, HetH), 5.25 (s, 2 H, PhCH<sub>2</sub>), 4.79 (d,  $J = 3.5$  Hz, 2 H, ArCH<sub>2</sub>NH), 4.54 (d,  $J = 4.4$  Hz, 4 H, ArCH<sub>2</sub>NH), 2.89-2.82 (comp, 6 H, CH<sub>2</sub>CH<sub>3</sub>), 1.27-1.06 (m, 12 H, CH<sub>2</sub>CH<sub>3</sub>).  $^{13}\text{C}$ - $\{^1\text{H}\}$  NMR (125 MHz, DMSO- $d_6$ ):  $\delta = 180.6$ , 163.6, 163.0, 160.3, 144.3, 143.5, 142.0, 137.4, 132.8, 131.6, 131.2, 128.8, 128.5, 128.4, 127.5, 127.1, 126.8, 126.1, 125.7, 122.3, 121.9, 121.3, 117.5, 110.6, 108.6, 42.8, 42.7, 36.9, 22.8, 22.7, 16.4, 16.3. MS (MALDI-TOF):  $m/z = 802.43$ ,  $[M+\text{Na}]^+$  calcd. for C<sub>45</sub>H<sub>45</sub>N<sub>7</sub>NaO<sub>4</sub>S 802.32.





**Sensor 4.  $^{13}\text{C}$  NMR**

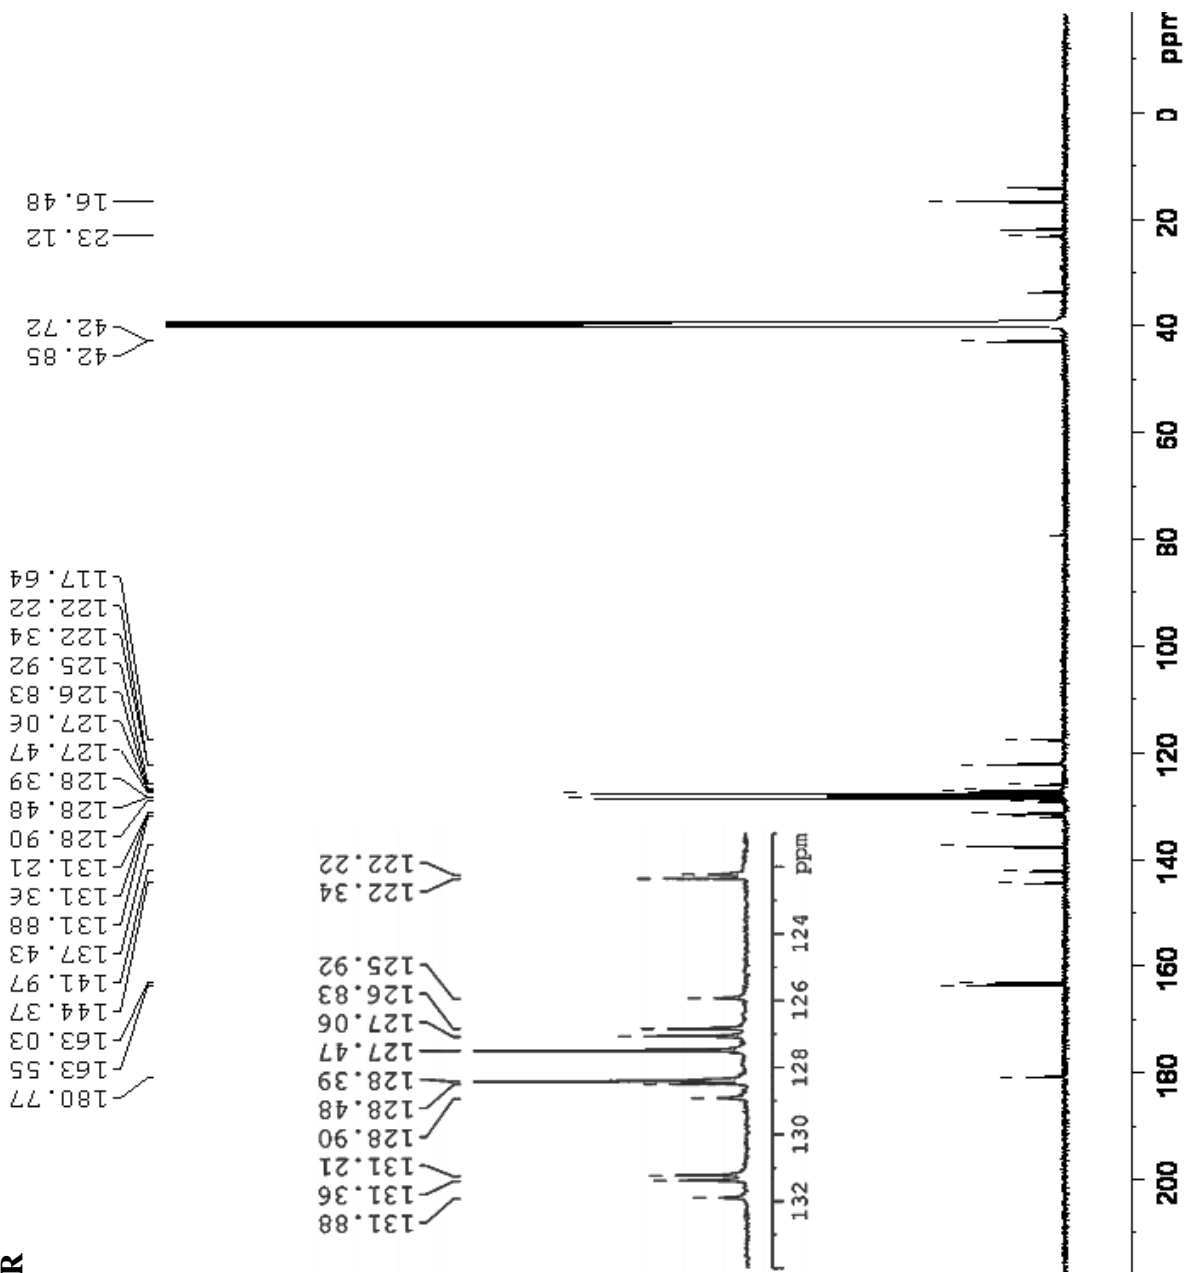

### Sensor 5. <sup>1</sup>H NMR

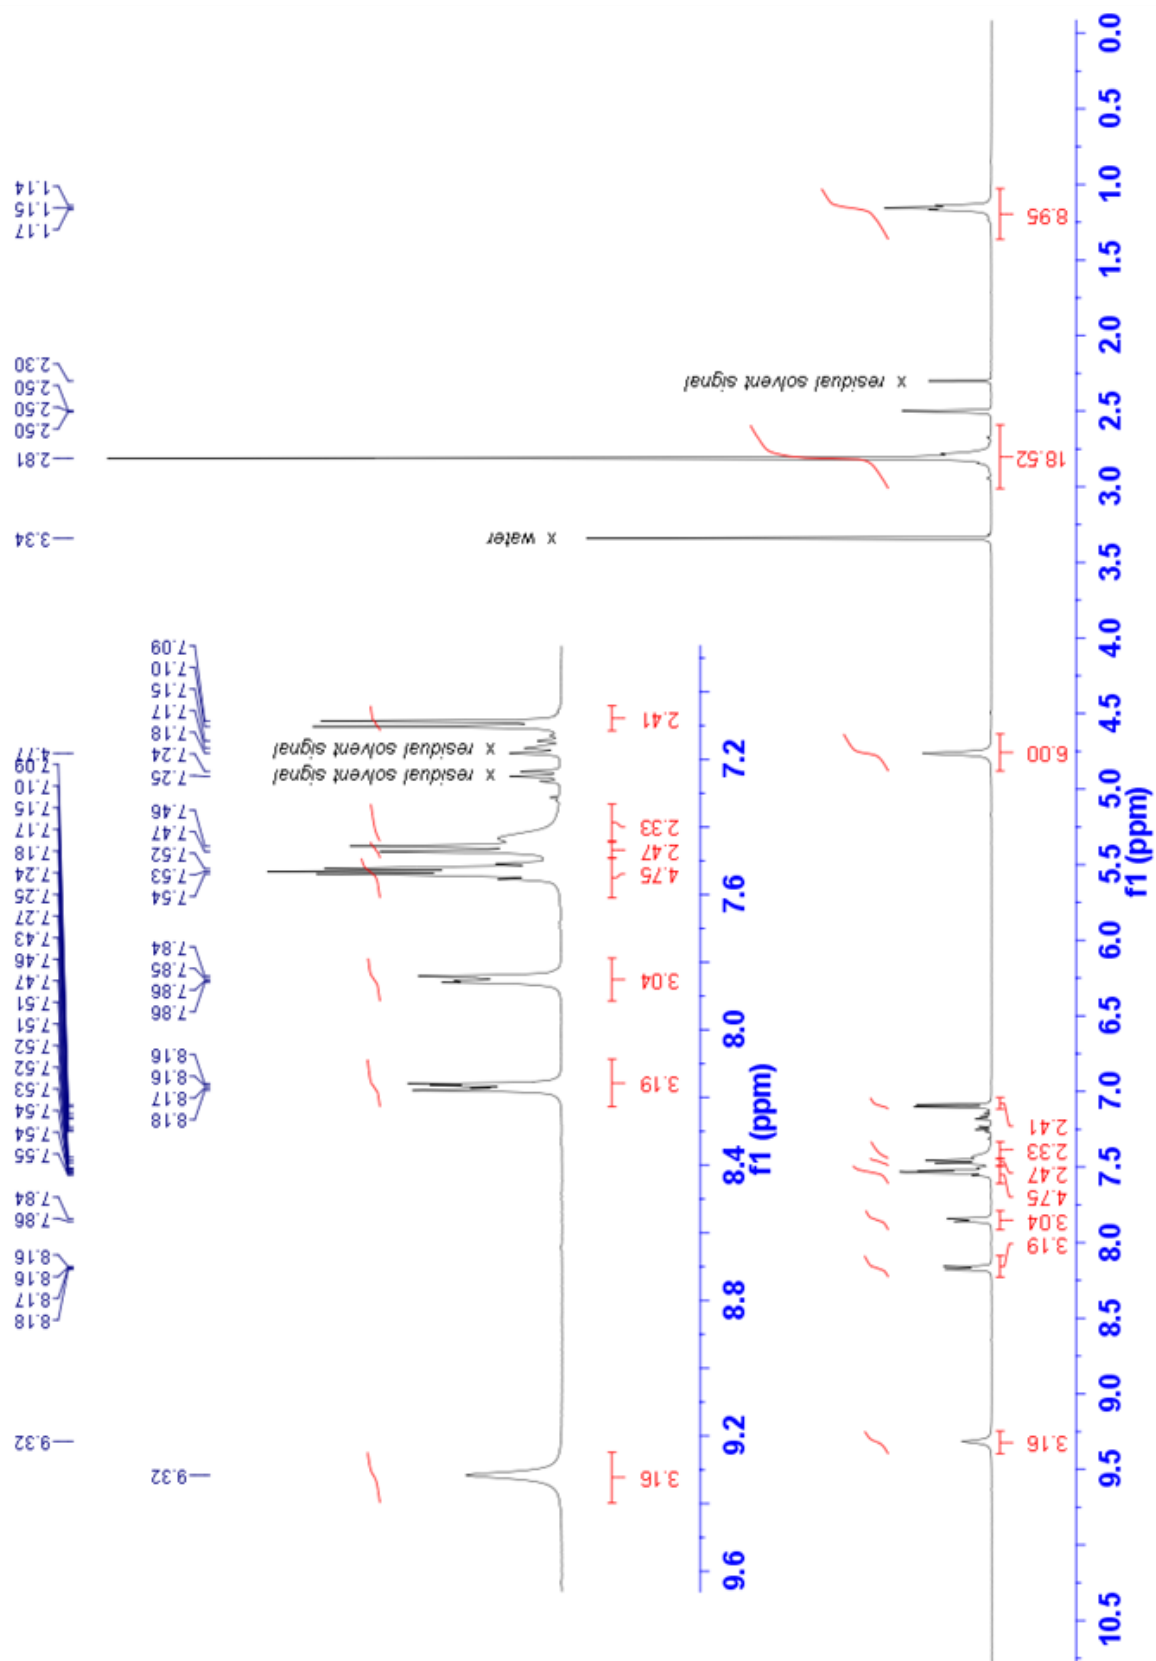

### Sensor 5. $^{13}\text{C}$ NMR

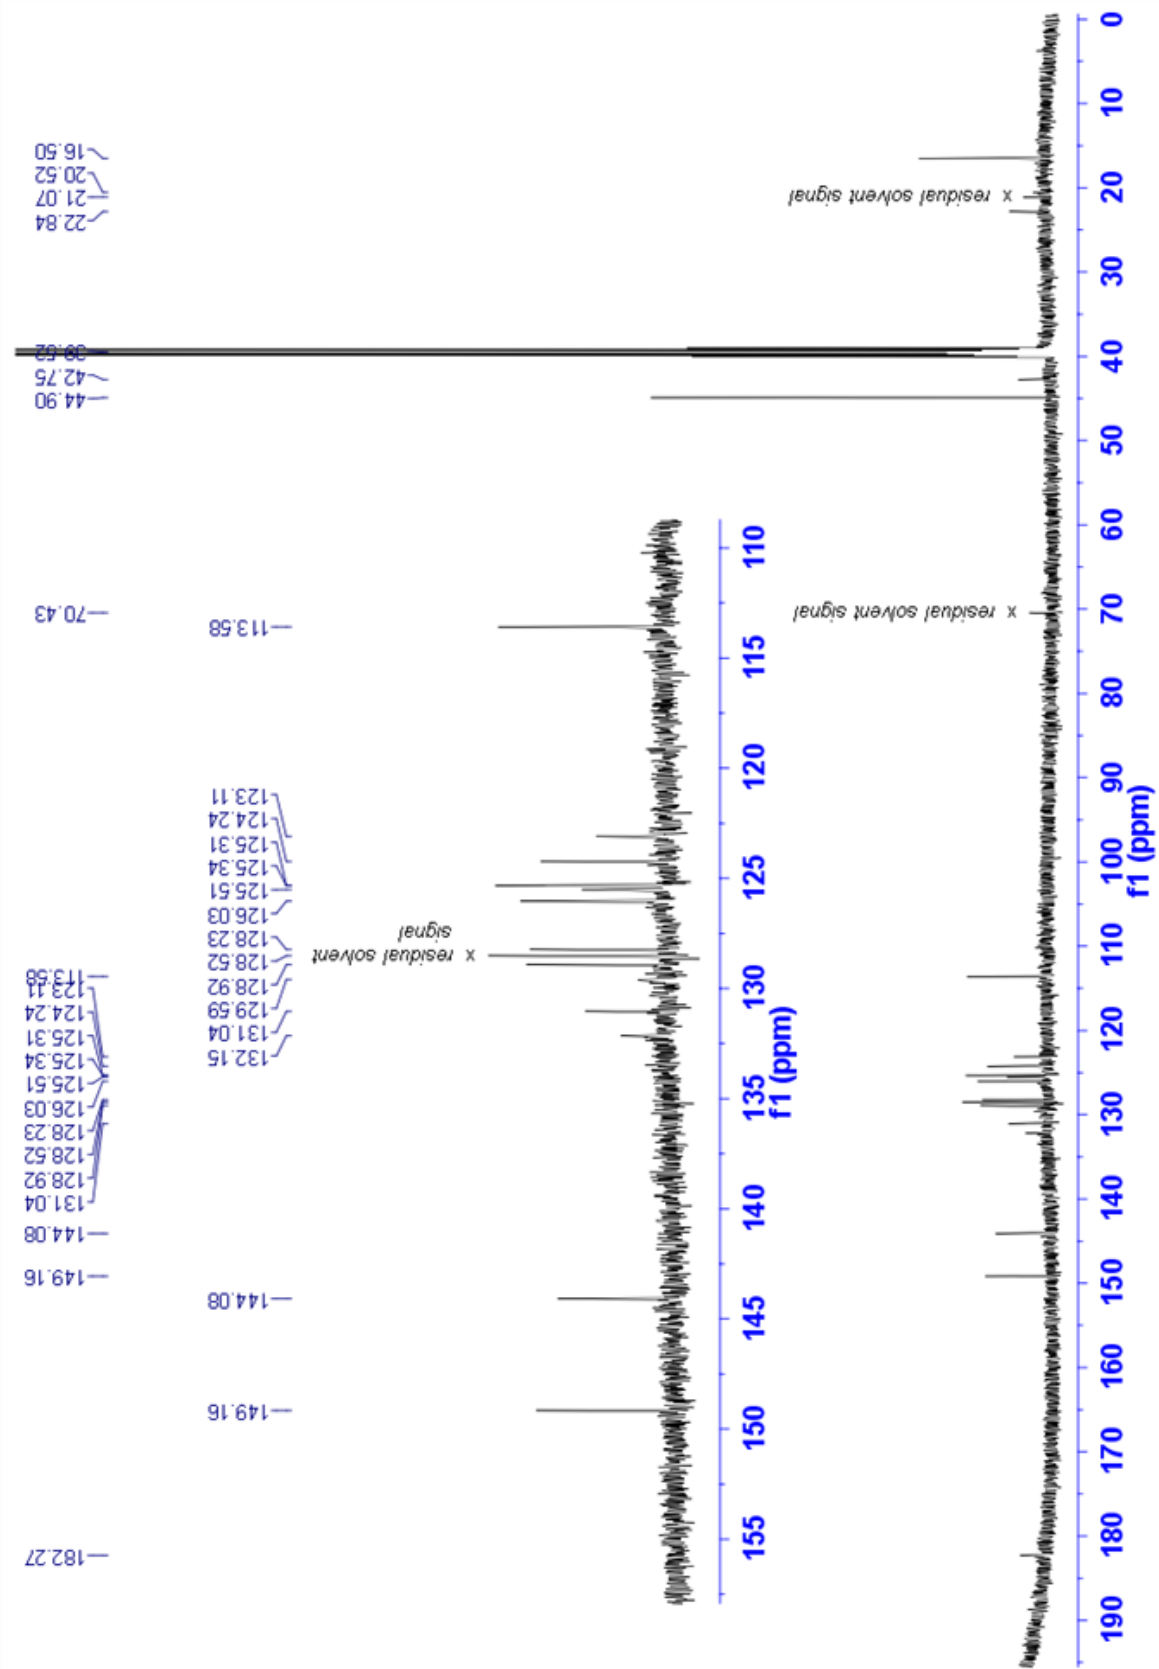

Sensor 7. <sup>1</sup>H NMR

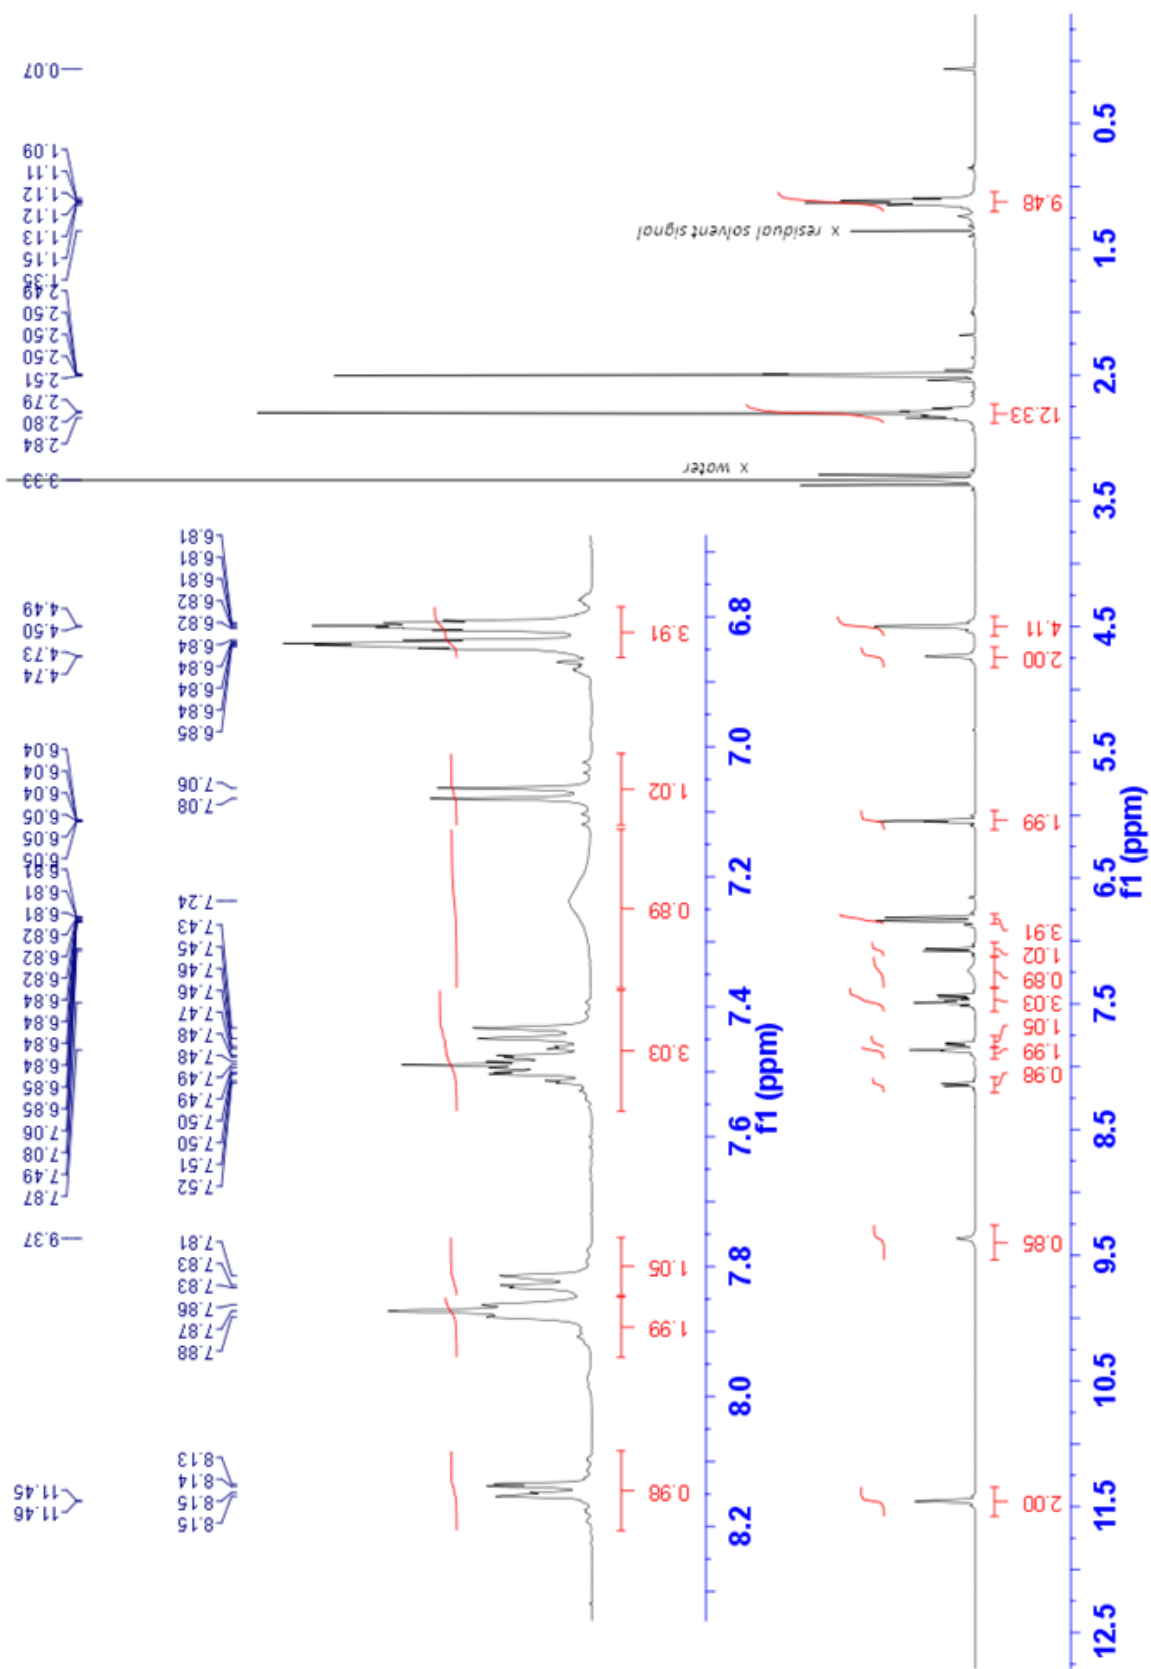

### Sensor 7. $^{13}\text{C}$ NMR

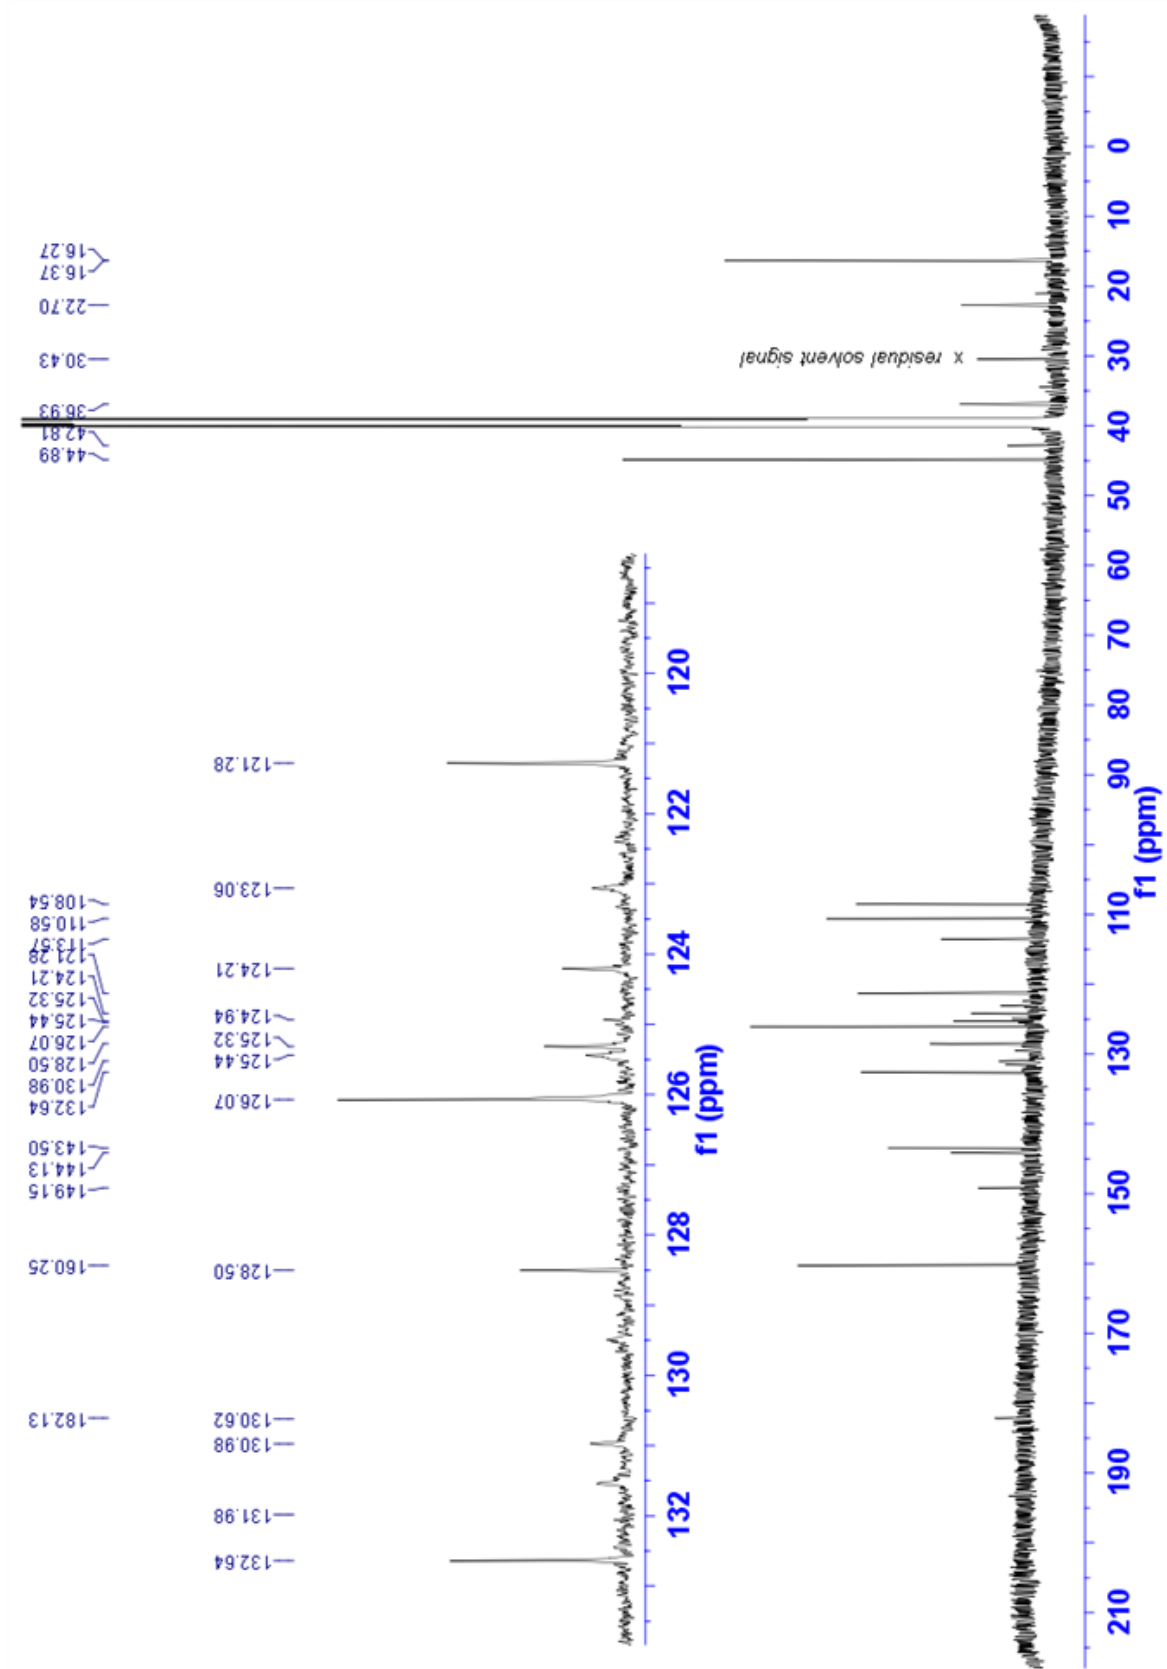



### Sensor 8. $^{13}\text{C}$ NMR

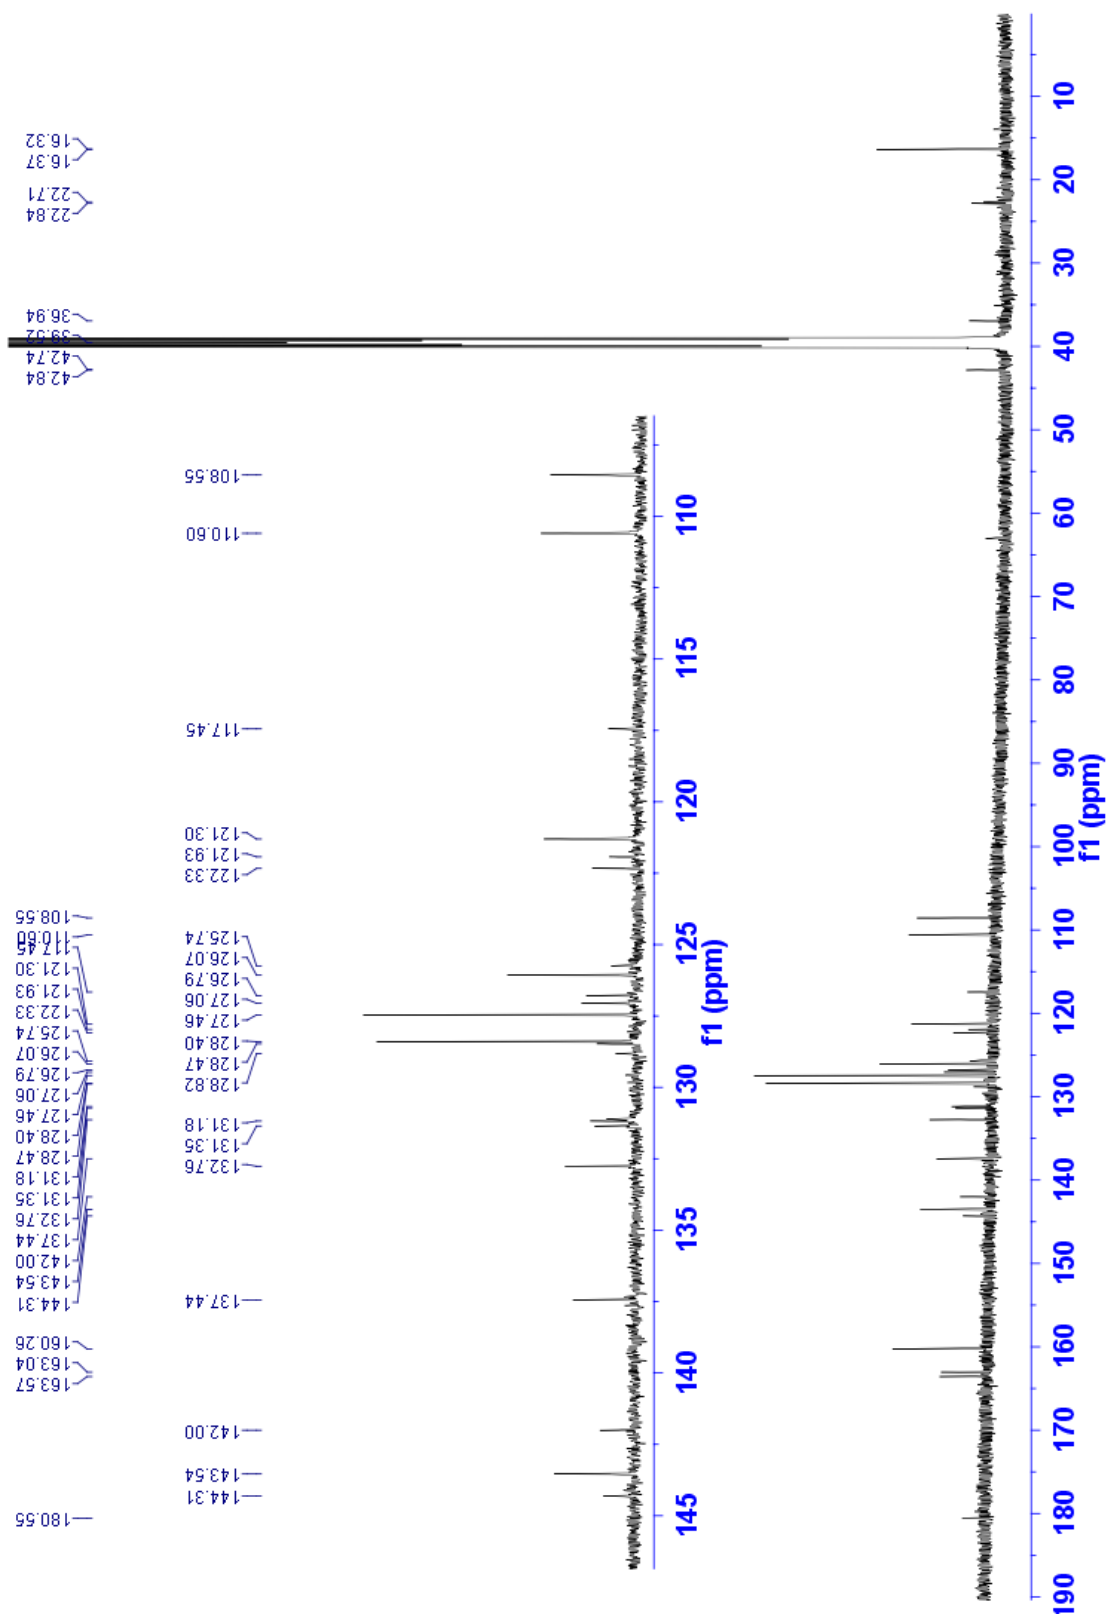





### 9. $^{13}\text{C}$ NMR

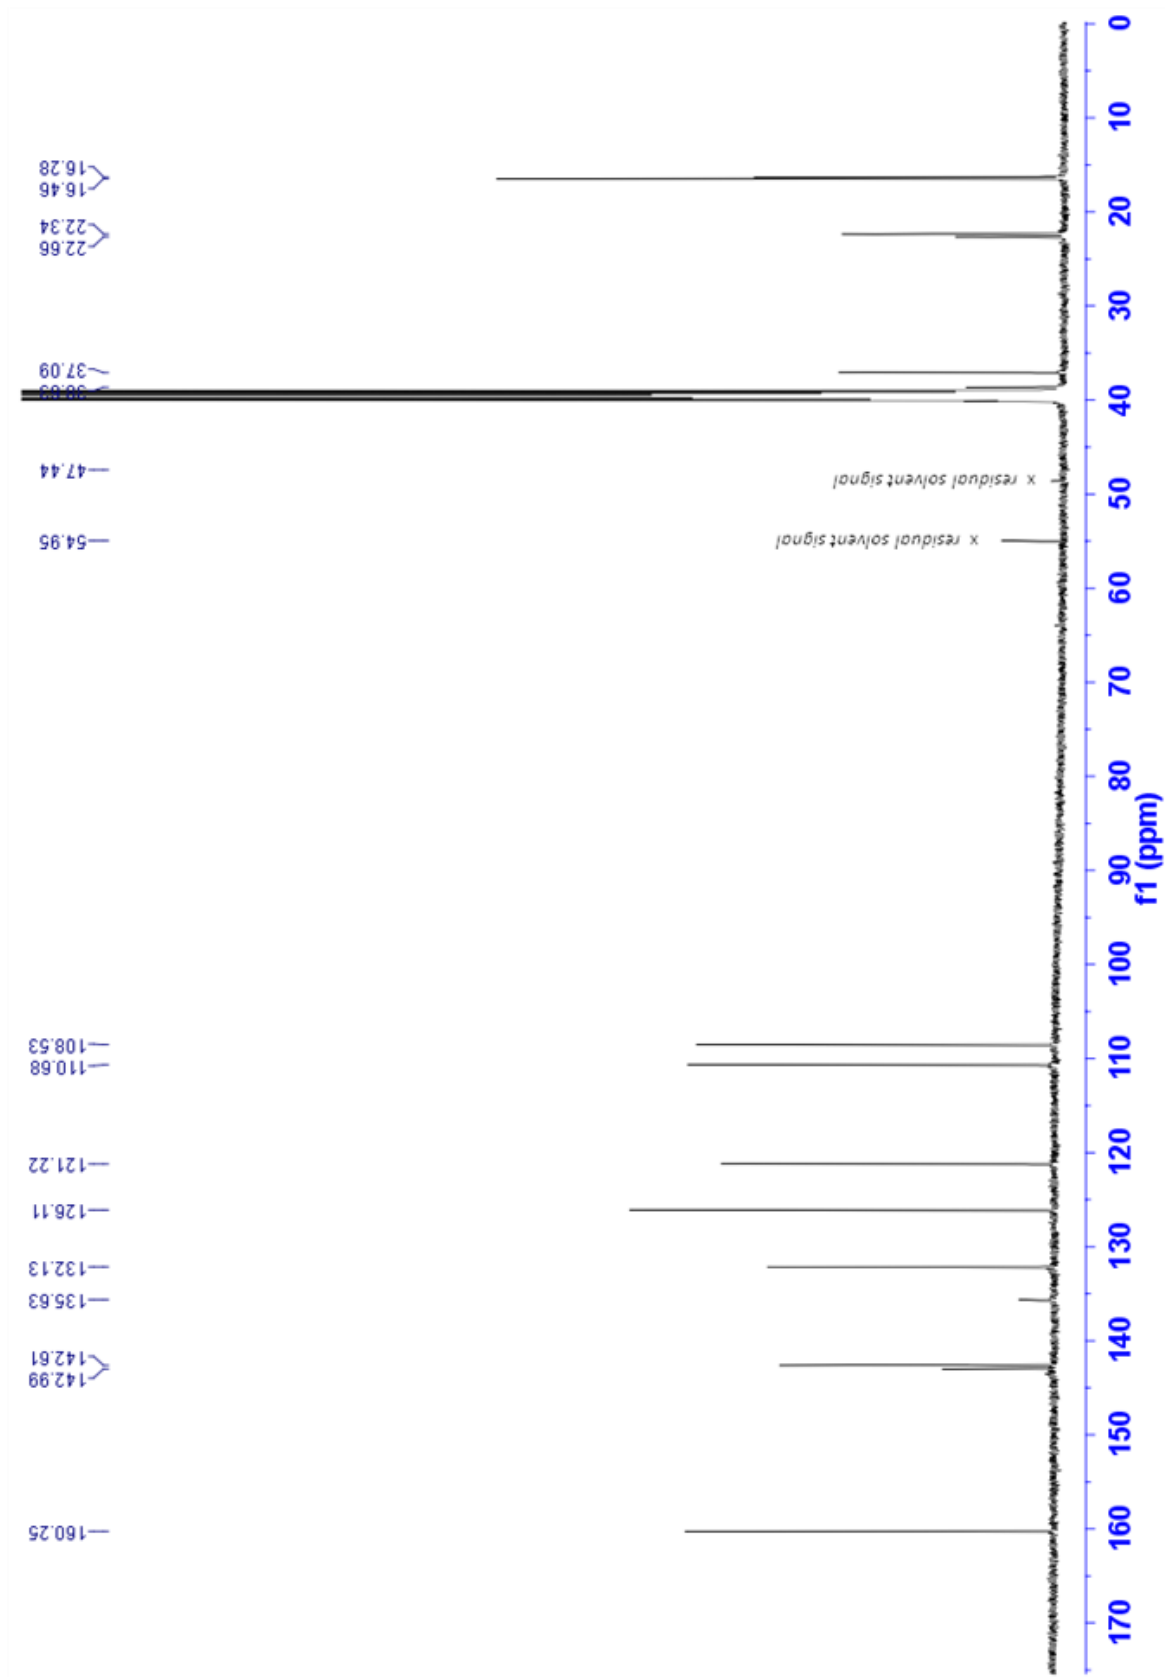

## X-ray structural analysis

The data were collected on a Nonius Kappa CCD diffractometer using a graphite monochromatized Mo-K $\alpha$  radiation ( $\lambda = 0.71075 \text{ \AA}$ ) at 153 K using an Oxford Cryostream low temperature device. Data reduction was performed using DENZO-SMN.<sup>3</sup> The structure was solved by direct methods using SIR97<sup>4</sup> and refined by full-matrix least-squares on  $F^2$  with anisotropic displacement parameters for the non-H atoms using SHELXL-97.<sup>5</sup> The hydrogen atoms on carbon were calculated in ideal positions with isotropic displacement parameters set to 1.2xUeq of the attached atom (1.5xUeq for methyl hydrogen atoms). The function,  $\sum w(|F_o|^2 - |F_c|^2)^2$ , was minimized, where  $w = 1/[(\sigma(F_o))^2 + (0.0499*P)^2 + (1.0626*P)]$  and  $P = (|F_o|^2 + 2|F_c|^2)/3$ . Neutral atom scattering factors and values used to calculate the linear absorption coefficient are from the *International Tables for X-ray Crystallography* (1992).<sup>6</sup> All figures were generated using Mercury from CCDC.

**Table S1** X-ray structural analysis details for the crystals obtained with sensor **2**, **3** and **5**

| compound reference                                                        | <b>2</b> -diox <sub>6</sub> | <b>3</b> -3H <sub>2</sub> PO <sub>4</sub> | <b>5</b>      |
|---------------------------------------------------------------------------|-----------------------------|-------------------------------------------|---------------|
| crystal system                                                            | Triclinic                   | Hexagonal                                 | Triclinic     |
| radiation type                                                            | MoK $\alpha$                | MoK $\alpha$                              | MoK $\alpha$  |
| wavelength (Å)                                                            | 0.71075                     | 0.71075                                   | 0.71075       |
| <i>a</i> (Å)                                                              | 12.595                      | 20.6054(3)                                | 15.1253(2)    |
| <i>b</i> (Å)                                                              | 13.891                      | 20.6054(3)                                | 18.3340(2)    |
| <i>c</i> (Å)                                                              | 15.904                      | 13.2836(2)                                | 19.6654(2)    |
| $\alpha$ (°)                                                              | 76.09                       | 90.00                                     | 99.2540(10)   |
| $\beta$ (°)                                                               | 86.26                       | 90.00                                     | 97.6060(10)   |
| $\gamma$ (°)                                                              | 89.20                       | 120.00                                    | 90.4190(10)   |
| <i>V</i> (Å <sup>3</sup> )                                                | 2695.2                      | 4884.37(12)                               | 5332.75(11)   |
| <i>T</i> (K)                                                              | 293(2)                      | 153(2)                                    | 153(2)        |
| space group                                                               | <i>P</i> , -1               | <i>P</i> 63                               | <i>P</i> , -1 |
| <i>Z</i>                                                                  | 1                           | 2                                         | 4             |
| $\mu$ (mm <sup>-1</sup> )                                                 | 0.096                       | 0.184                                     | 0.223         |
| Theta range (°)                                                           | 2.02–27.12                  | 2.28–27.46                                | 1.79–27.50    |
| No. of reflections measured                                               | 7210                        | 14881                                     | 37374         |
| No. of independent reflections                                            | 7210                        | 7463                                      | 24321         |
| <i>R</i> <sub>int</sub>                                                   | 0.0000                      | 0.0370                                    | 0.0234        |
| <i>R</i> <sub><i>I</i></sub> ( <i>I</i> > 2 $\sigma$ ( <i>I</i> ))        | 0.0867                      | 0.0472                                    | 0.0751        |
| <i>wR</i> ( <i>F</i> <sup>2</sup> ) ( <i>I</i> > 2 $\sigma$ ( <i>I</i> )) | 0.1405                      | 0.1037                                    | 0.1685        |
| <i>R</i> <sub><i>J</i></sub> (all data)                                   | 0.1731                      | 0.0801                                    | 0.1238        |
| <i>wR</i> ( <i>F</i> <sup>2</sup> ) (all data)                            | 0.1602                      | 0.1170                                    | 0.1762        |
| GOF on <i>F</i> <sup>2</sup>                                              | 1.435                       | 1.055                                     | 2.633         |
| $\Delta r_{max}$ , $\Delta r_{min}$ (e Å <sup>-3</sup> )                  | 0.549, -0.332               | 0.422, -0.301                             | 1.290, -2.551 |
| $\Delta r$ (rms) (e Å <sup>-3</sup> )                                     | 0.049                       | 0.043                                     | 0.082         |

**2**·diox<sub>6</sub>: A crystal suitable for single-crystal X-ray diffractometric analysis was obtained by slow evaporation from a dioxane solution. The unit cell contains two molecules of receptor **2** and 12 molecules of co-crystallized dioxane. One of the dioxane molecules resides on the inversion centre. **3**·3H<sub>2</sub>PO<sub>4</sub>: Crystals of **3** in presence of tetrabutylammonium dihydrogenphosphate suitable for X-ray analysis were grown from acetone solution. The unit cell of the hexagonal crystal contains two molecules of **3**, six dihydrogenphosphate anions and 6 tetrabutylammonium cations. The molecule resides around a crystallographic three-fold rotation axis at 2/3, 1/3, z. **5** Crystallizes in the triclinic system and crystals suitable for X-ray diffraction were obtained by slow evaporation of an acetone solution.

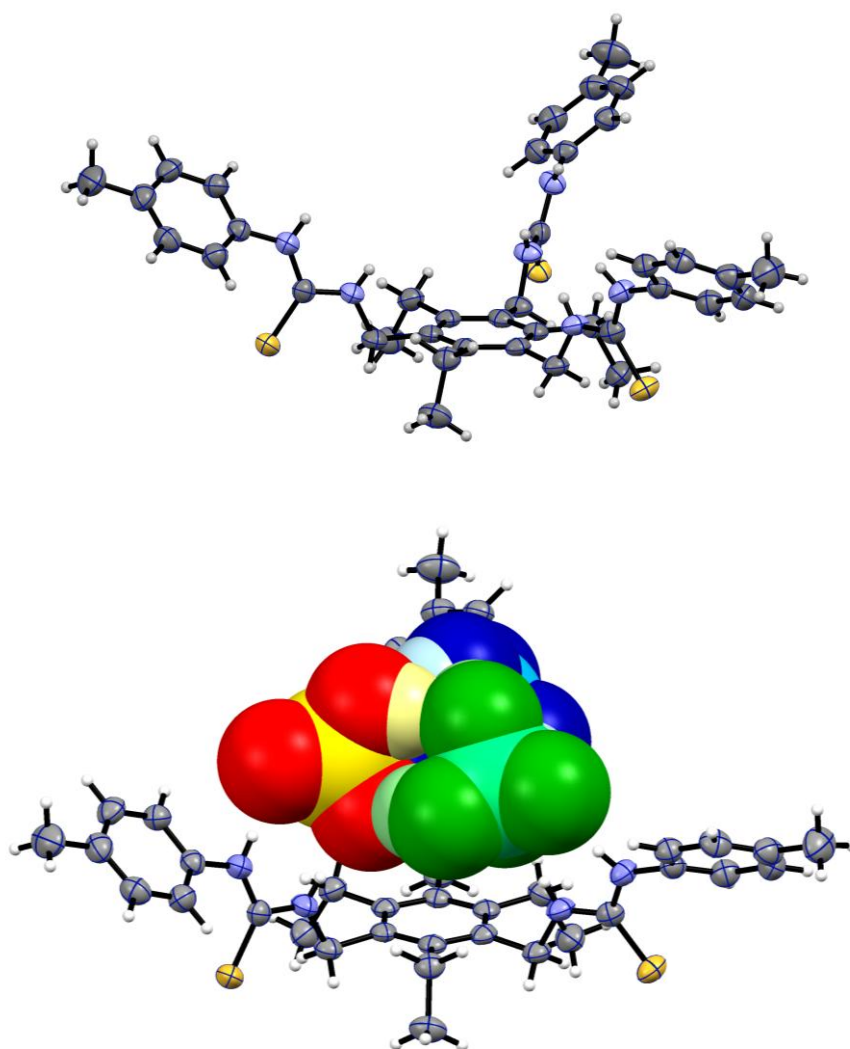

**Fig. S1** Two views of [3·3H<sub>2</sub>PO<sub>4</sub>]<sup>-</sup> showing displacement ellipsoids scaled to the 50% probability level. **Top:** 3H<sub>2</sub>PO<sub>4</sub><sup>-</sup> cluster has been removed for clarity. In the bottom panel the three H<sub>2</sub>PO<sub>4</sub><sup>-</sup> anions have been colored differently.

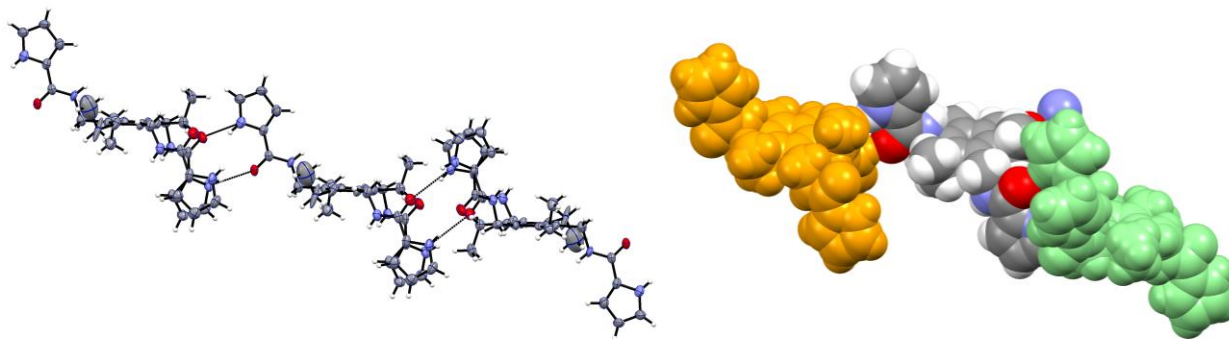

**Fig. S2** View of the up-down arrangement of the arms of **2**. Interaction of neighboring molecules of **2** is highlighted. The dashed line represent the hydrogen bonds formed between the pyrrole N-H and the amidic C=O.

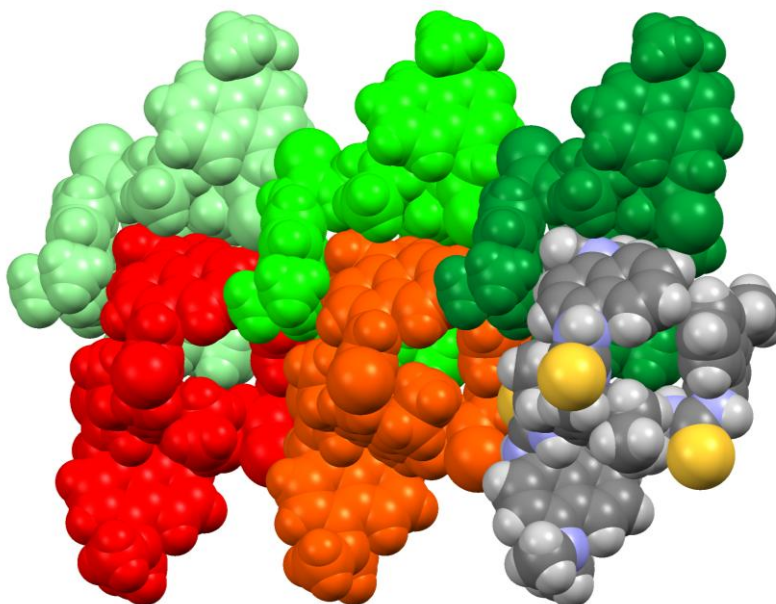

**Fig. S3** The spacefill model of **5** shows the closely interdigitated structure of the crystal. The sensor molecules maximize the number of interactions by adopting an up-down conformation of the arms.

### Solution Behavior by Variable-Temperature NMR

Variable-temperature  $^1\text{H}$  NMR spectra of  $2:\text{Bu}_4\text{NH}_2\text{PO}_4 = 1:1$  were recorded in a mixture of  $\text{CD}_3\text{CN}:\text{acetone-}d_6:\text{DMSO-}d_6 = 10:1:0.5$  due to the low freezing point of this solvent. As the temperature is reduced, the amidopyrrole and methylene signals display a little shifting and some broadening, although no peak splitting occurs, probably due to the “locking” of the conformation upon complexation with phosphate anion.

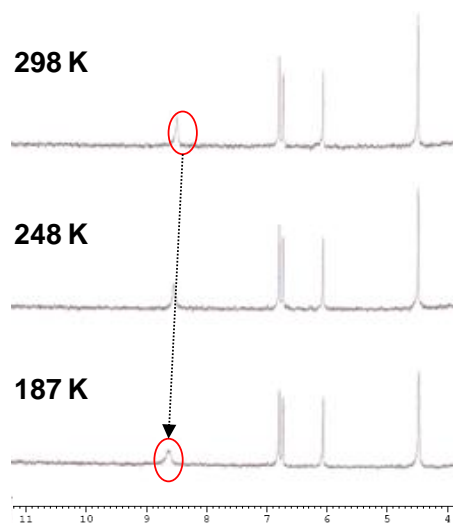

**Fig. S4** VT-NMR of the receptor **2** in the presence of  $\text{H}_2\text{PO}_4^-$ .

### Examples of NMR titrations

In a typical titration procedure, 1.0 ml of sensor solution ( $[\mathbf{2}] = [\mathbf{3}] = 1.0 \times 10^{-2} \text{ M}$ ) was placed in a NMR tube. The NMR spectrum was recorded in the absence of anion at room temperature. Then NMR spectra were repeatedly acquired after addition of 1  $\mu\text{L}$  aliquots of anion solution. The stock solutions of anions contained the same concentration of sensor as the initial solution titrated. Some of the NMR isotherms display a slight sigmoidal dependence, which is presumed to be due to the sensor self-association at high NMR concentrations.

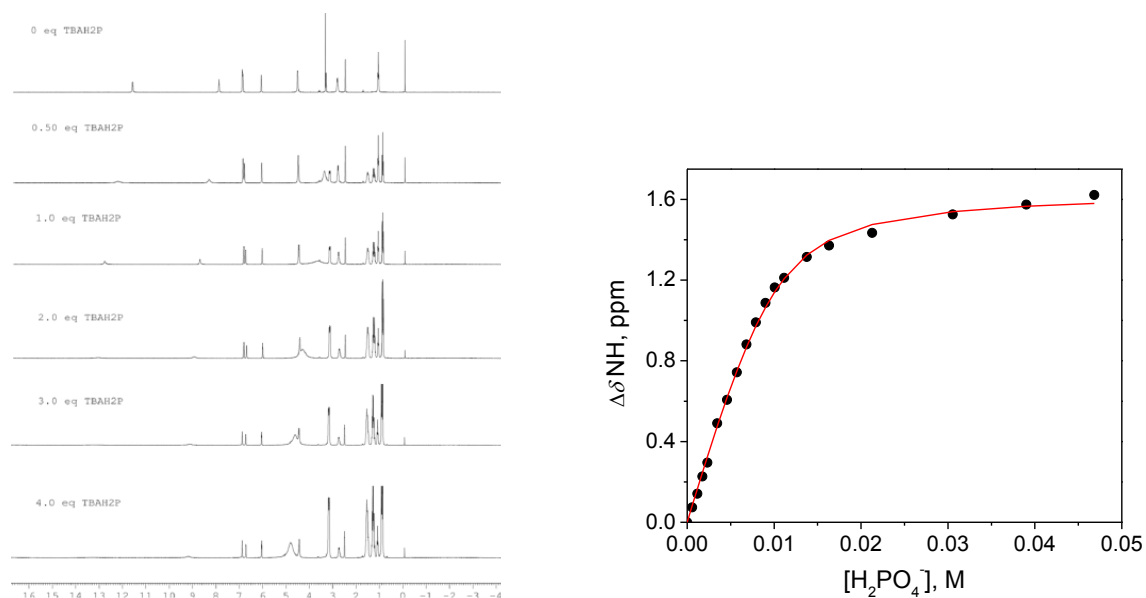

**Fig. S5** <sup>1</sup>H NMR spectra of **2** (2.0 × 10<sup>-2</sup> M) titrated with H<sub>2</sub>PO<sub>4</sub><sup>-</sup> (0.5, 1.0, 2.0, 3.0, and 4.0 eq.).

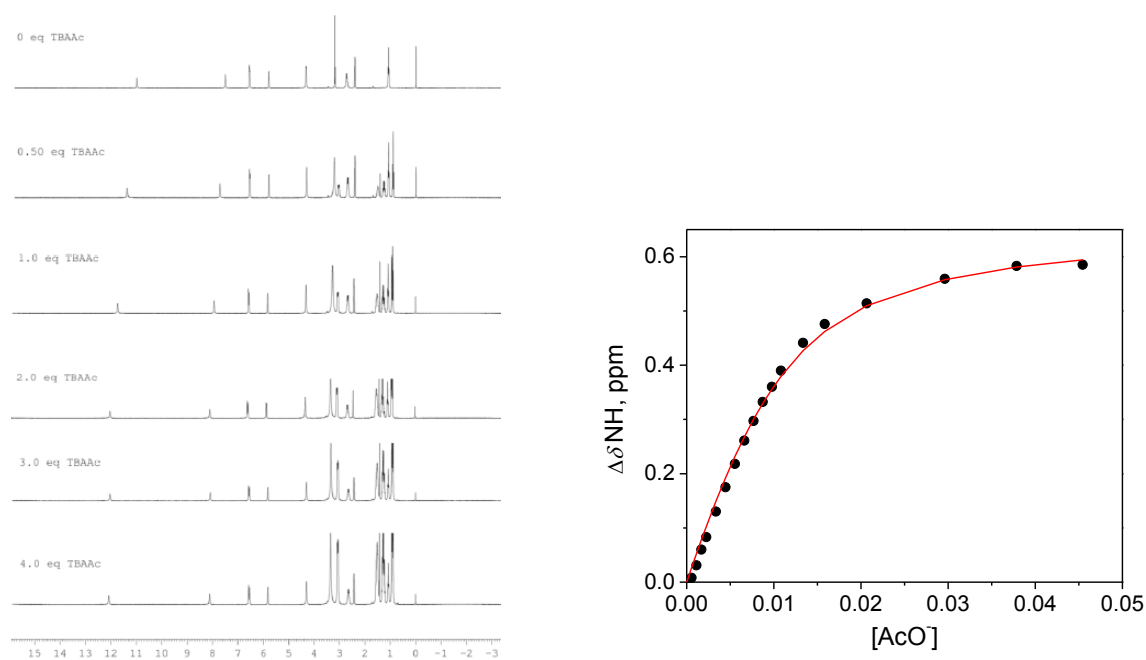

**Fig. S6** <sup>1</sup>H NMR spectra of **2** (2.0 × 10<sup>-2</sup> M) titrated with AcO<sup>-</sup> (0.5, 1.0, 2.0, 3.0, and 4.0 eq.).

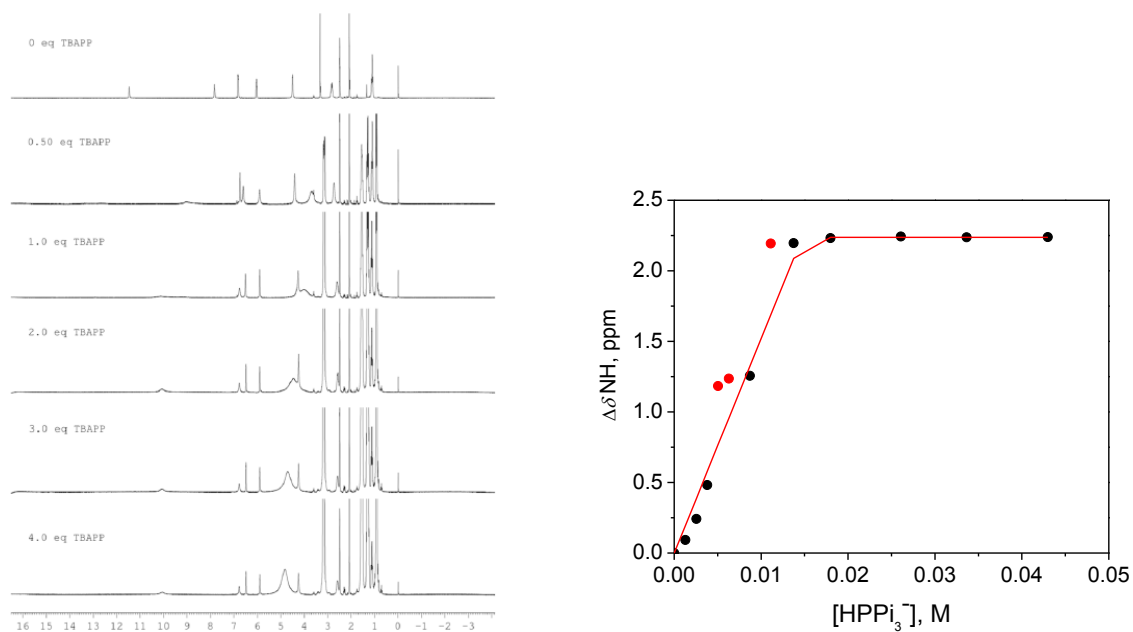

**Fig. S7**  $^1\text{H}$  NMR spectra of **2** ( $2.0 \times 10^{-2}$  M) titrated with  $\text{HPPi}_3^-$  (0.5, 1.0, 2.0, 3.0, and 4.0 eq.).

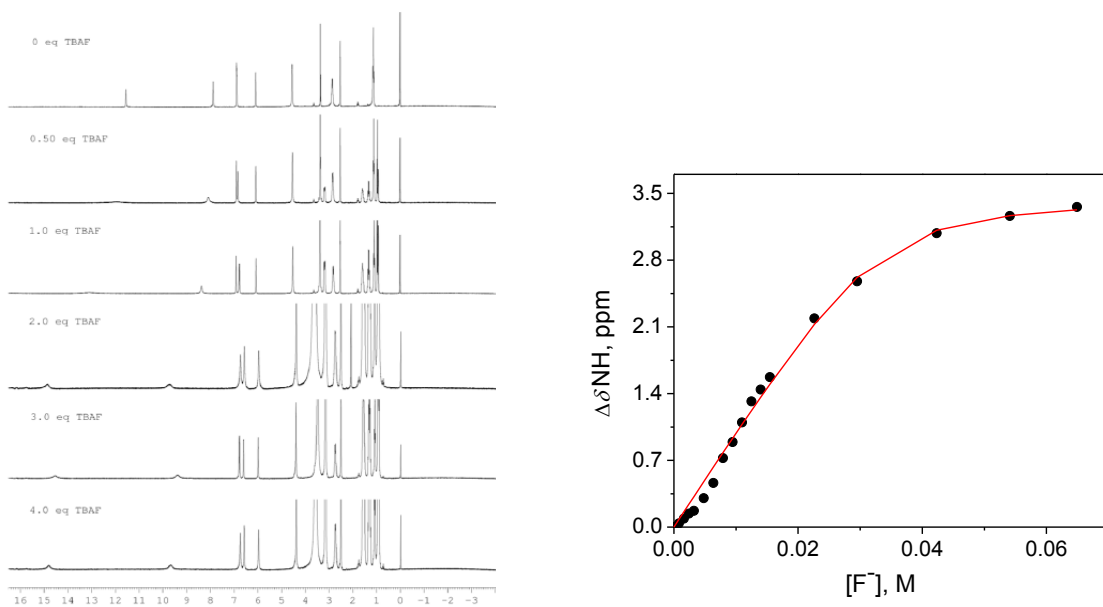

**Fig. S8**  $^1\text{H}$  NMR spectra of **2** ( $2.0 \times 10^{-2}$  M) titrated with  $\text{F}^-$  (0.5, 1.0, 2.0, 3.0, and 4.0 eq.).



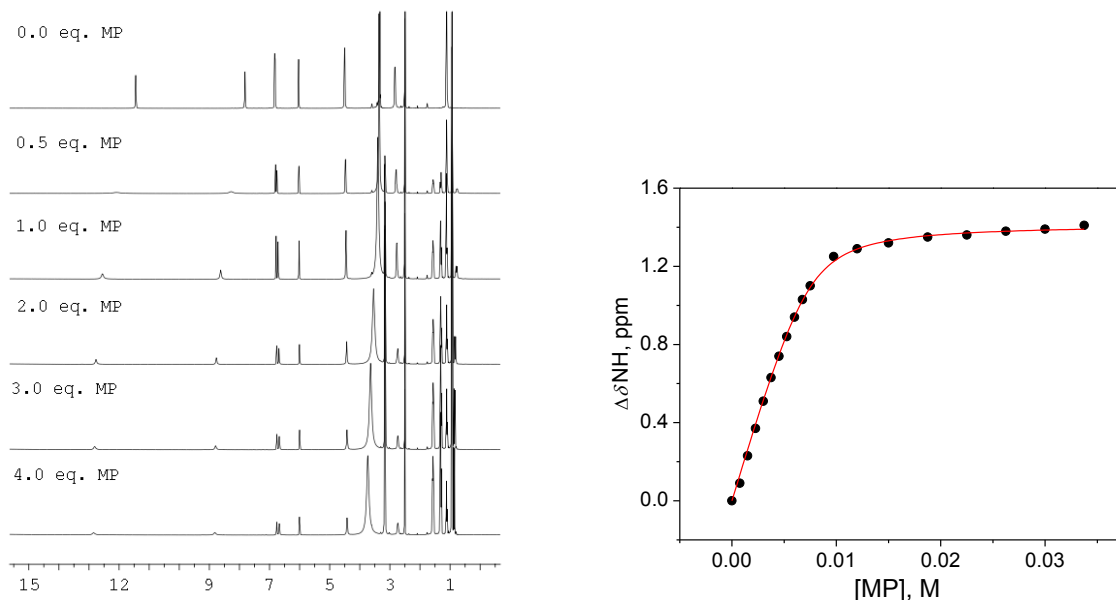

**Fig. S9**  $^1\text{H}$  NMR spectra of **2** ( $2.0 \times 10^{-2}$  M) titrated with MP (0.5, 1.0, 2.0, 3.0, and 4.0 eq.).

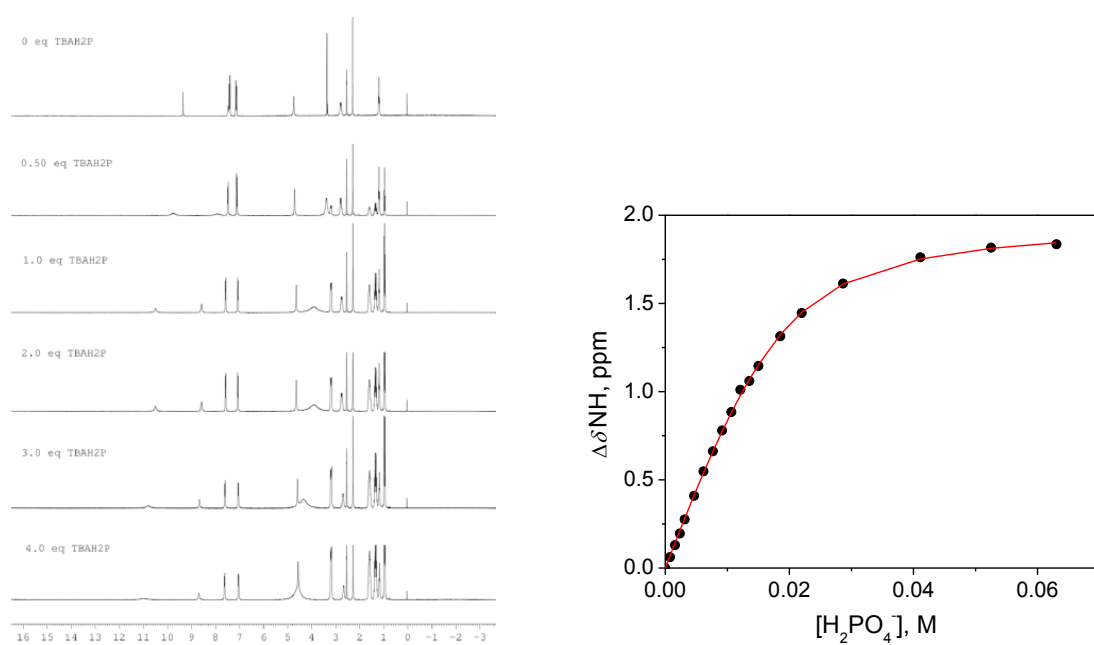

**Fig. S10**  $^1\text{H}$  NMR spectra of **3** ( $2.0 \times 10^{-2}$  M) titrated with  $\text{H}_2\text{PO}_4^-$  (0.5, 1.0, 2.0, 3.0, and 4.0 eq.).

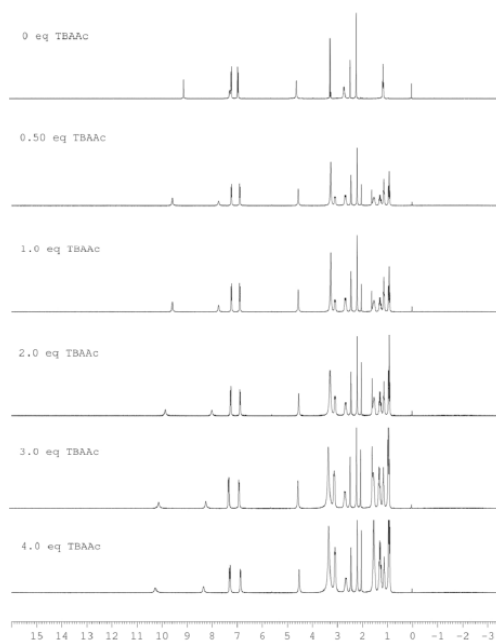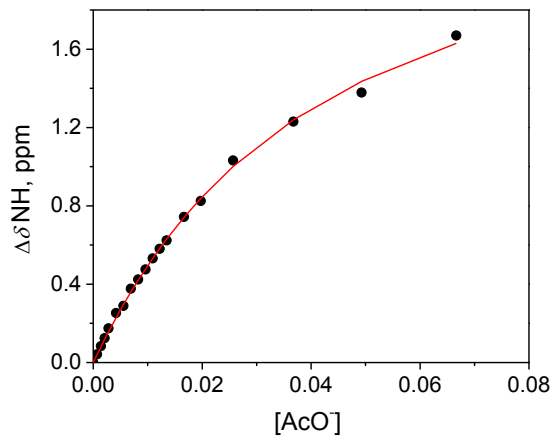

**Fig. S11**  $^1\text{H}$  NMR spectra of **3** ( $2.0 \times 10^{-2}$  M) titrated with  $\text{AcO}^-$  (0.5, 1.0, 2.0, 3.0, and 4.0 eq.).

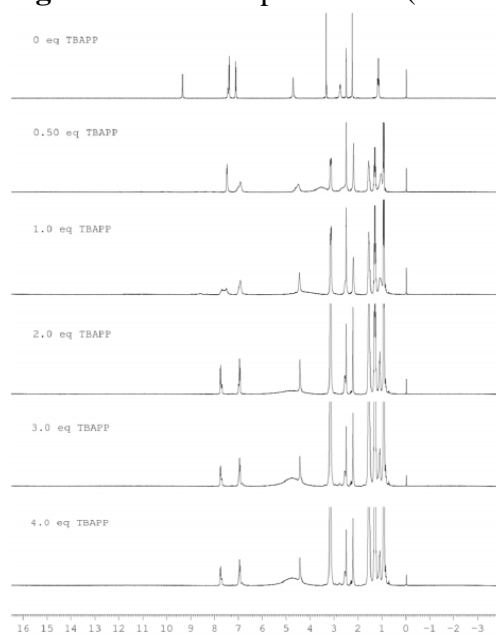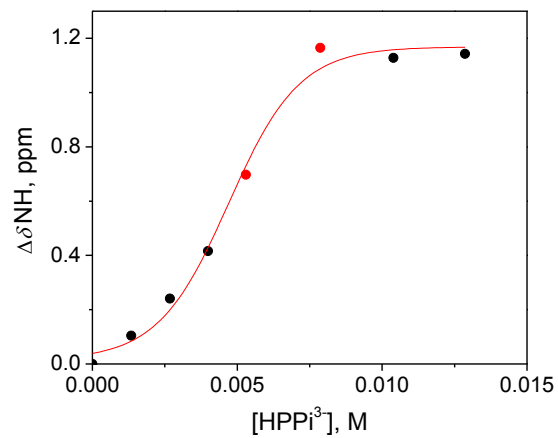

**Fig. S12**  $^1\text{H}$  NMR spectra of **3** ( $2.0 \times 10^{-2}$  M) titrated with  $\text{HPPi}^{3-}$  (0.5, 1.0, 2.0, 3.0, and 4.0 eq.).

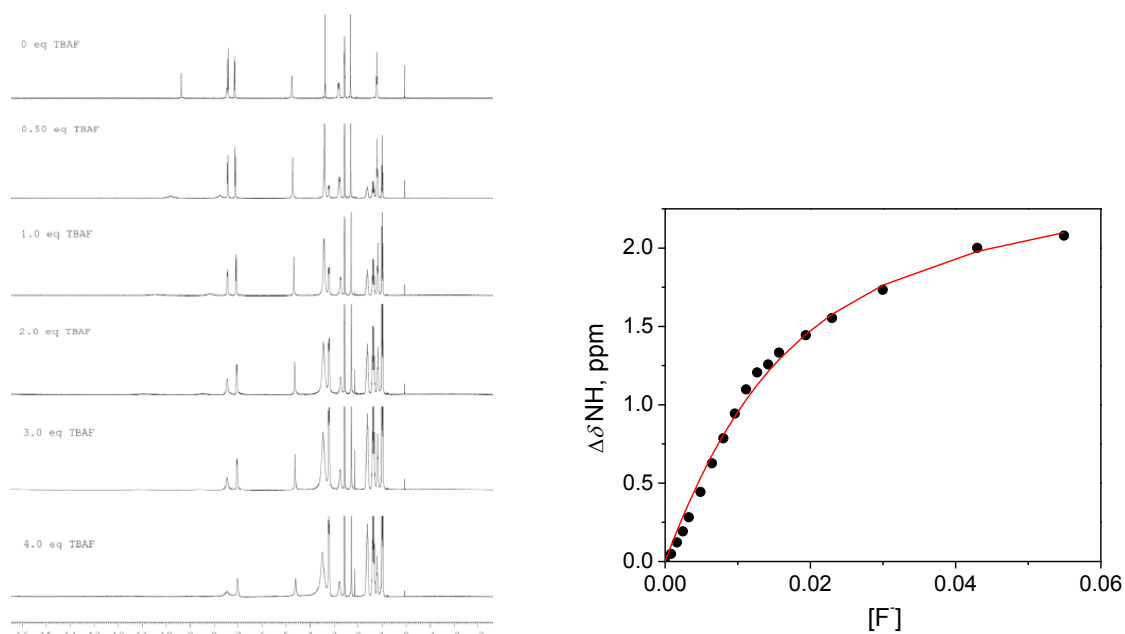

**Fig. S13**  $^1\text{H}$  NMR spectra of **3** ( $2.0 \times 10^{-2}$  M) titrated with  $\text{F}^-$  (0.5, 1.0, 2.0, 3.0, and 4.0 eq.).

### MALDI and Electrospray mass-spectrometric studies of sensor-anion complexes

In a typical procedure 1.0  $\mu\text{L}$  of  $1.0 \times 10^{-5}$  M solution of sensor **2** with an excess of a corresponding anion in acetone was spotted onto the target using a syringe. The MALDI-TOF spectrum was recorded in the negative mode.

In a typical procedure, 10.0  $\mu\text{L}$  of  $1.0 \times 10^{-5}$  M solutions of **2** or **3** with an excess of a corresponding anion in 50-90% acetonitrile were introduced into the ionization chamber using a syringe. The ESI spectrum was recorded at room temperature using positive or negative detection mode.

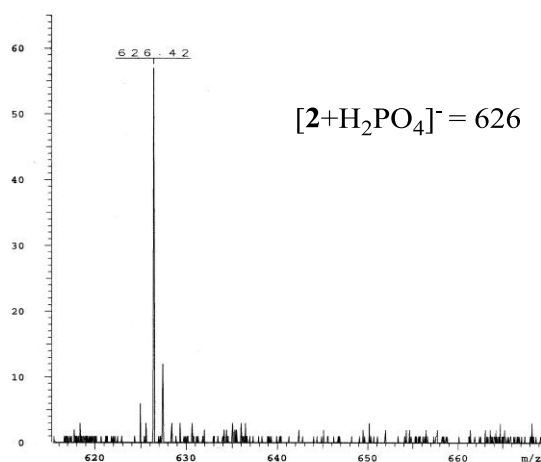

**Fig. S14** MALDI-TOF mass spectrum of **2**•dihydrogenphosphate complex.

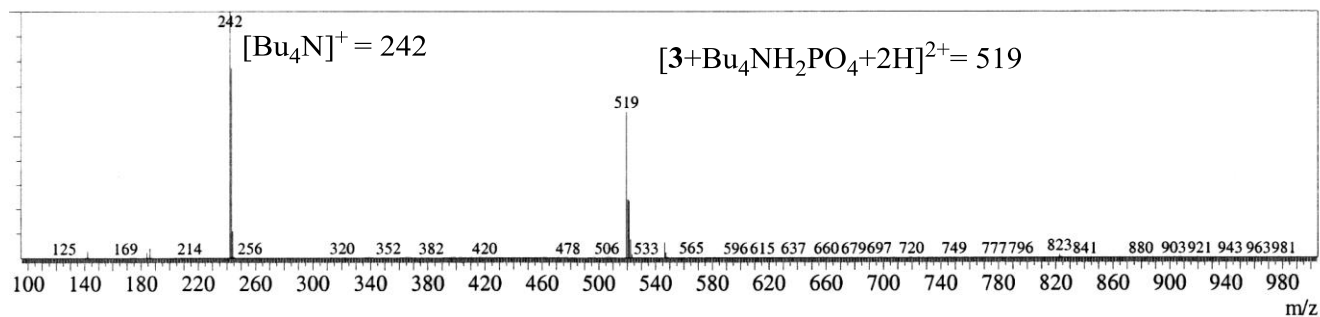

**Fig. S15** ESI mass spectrum of  $3 \cdot$ dihydrogenphosphate complex.

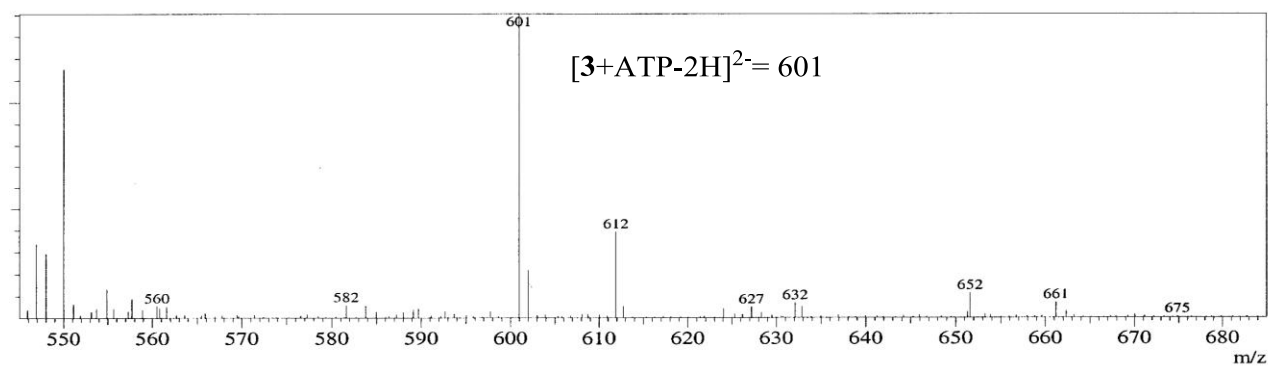

**Fig. S16** ESI mass spectrum of  $3 \cdot$ ATP complex.

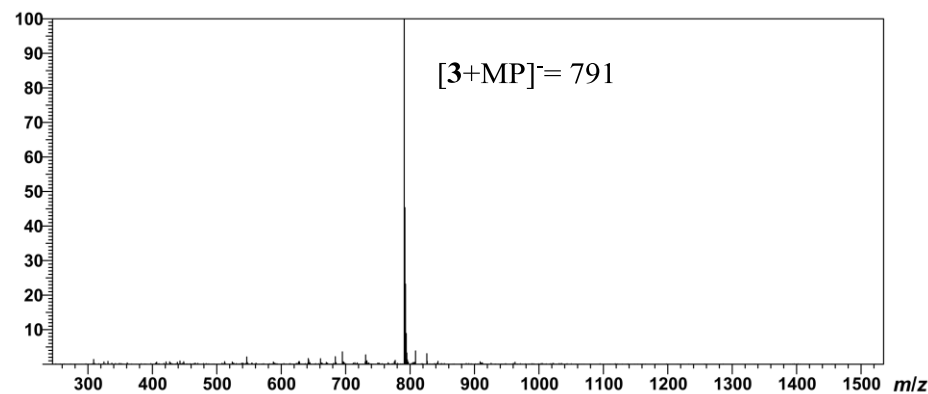

**Fig. 17** ESI mass spectrum (negative mode) of the complex of  $3 \cdot$ MP in acetonitrile.

### Job-Plot Experiments

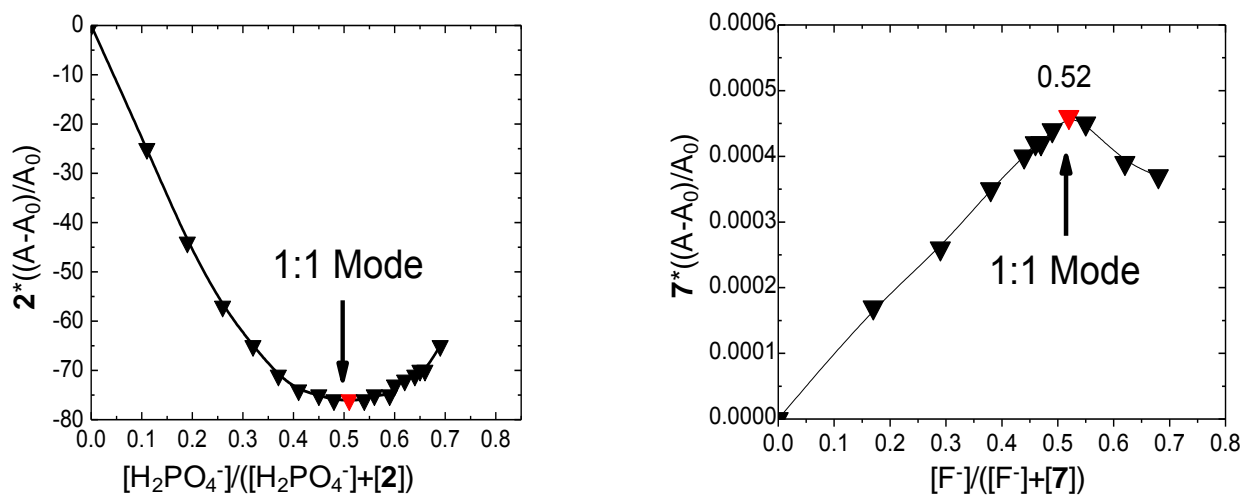

**Fig. S18** UV-Vis titrations of **2** with  $\text{H}_2\text{PO}_4^-$  (left) and **7** with  $\text{F}^-$  (right).

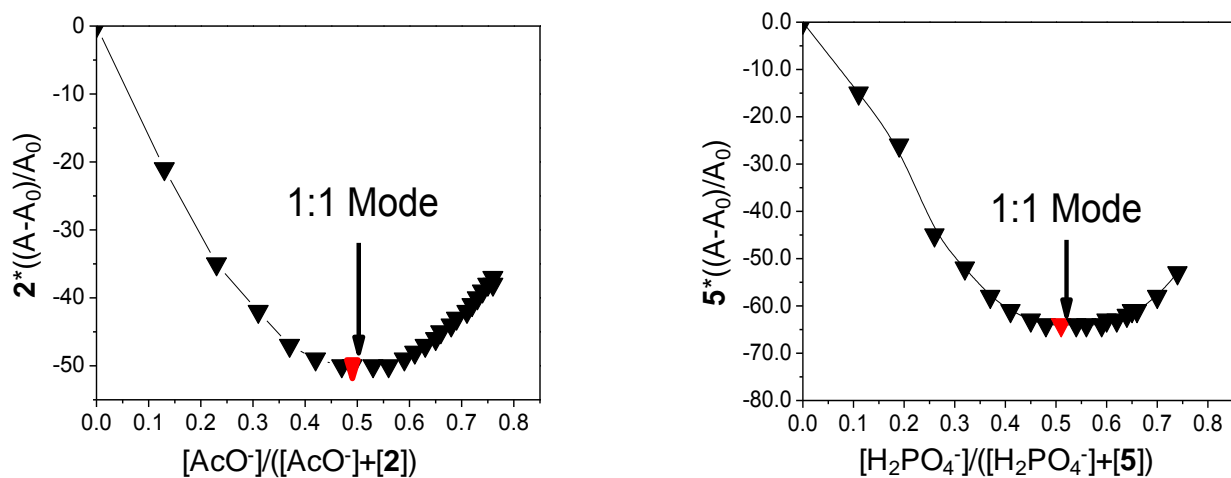

**Fig. S19** UV-Vis titrations of **2** with  $\text{AcO}^-$  (left) and **5** with  $\text{H}_2\text{PO}_4^-$  (right).

### Photophysical properties and fluorimetric titrations

In a typical titration procedure, 3.0 ml of a sensor solution were placed in a 1 cm fluorescence cell. The fluorescence spectrum was recorded in the absence of an anion at room temperature. Then the emission spectra were repeatedly acquired after addition of 1-2  $\mu\text{L}$  aliquots of anion solution. The stock solutions of anions contained the same concentration of sensor as the initial solution titrated. All sensors were excited at the isosbestic point of their absorption or at the point where no change in absorption is observed. The photophysical properties of **5-7** were reported previously.<sup>2</sup>

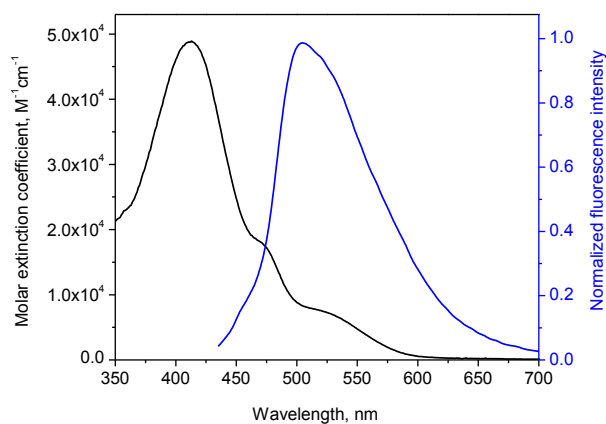

$$\phi = 10.4 \pm 1 \% ; \tau_1 = 4.5 \text{ ns}, \tau_2 = 23.5 \text{ ns}$$

**Fig. S20** Absorption and emission spectra of **4** in DMSO.  $\lambda_{\text{ex}} = 400 \text{ nm}$ .

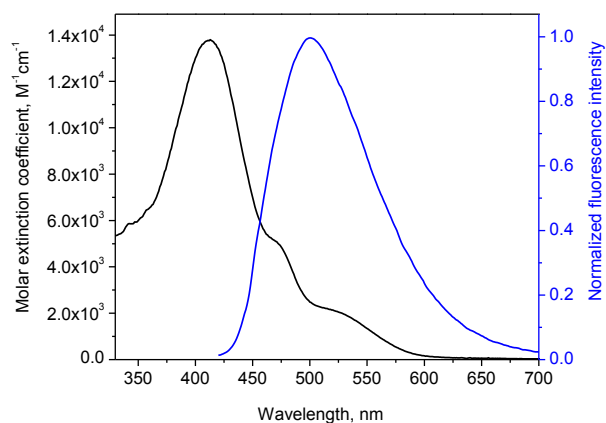

$$\phi = 11.9 \pm 1 \% ; \tau_1 = 6.5 \text{ ns}, \tau_2 = 21.9 \text{ ns}$$

**Fig. S21** Absorption and emission spectra of **8** in DMSO.  $\lambda_{\text{ex}} = 400 \text{ nm}$ .

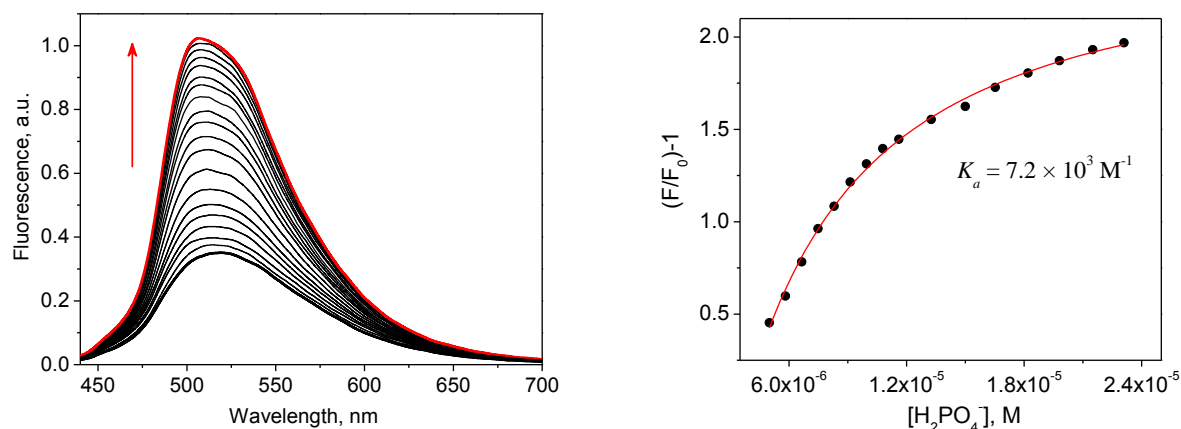

**Fig. S22** Fluorescence spectra of **4** (10 μM) upon the addition of H<sub>2</sub>PO<sub>4</sub><sup>-</sup> in DMSO.  $\lambda_{\text{ex}} = 400$  nm. [H<sub>2</sub>PO<sub>4</sub><sup>-</sup>] = 0 – 25 μM.

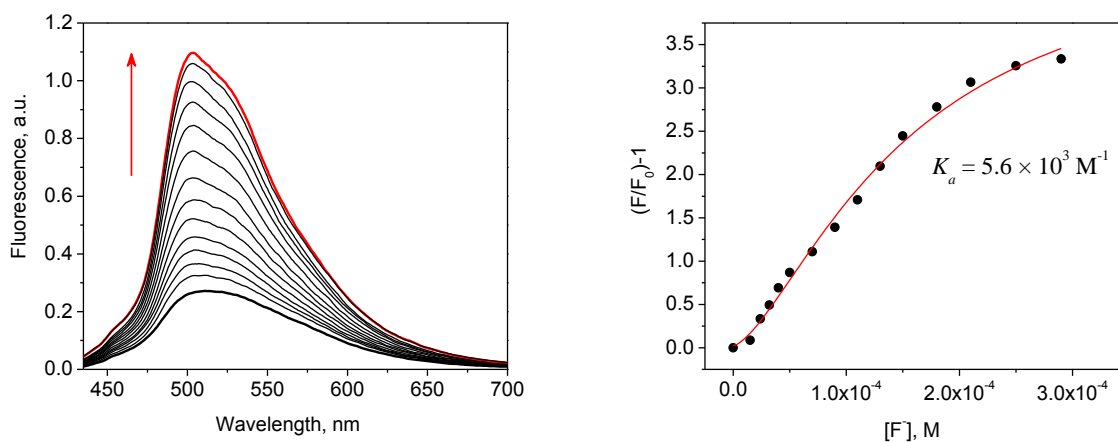

**Fig. S23** Fluorescence spectra of **4** (10 μM) upon the addition of F<sup>-</sup> in DMSO.  $\lambda_{\text{ex}} = 400$  nm. [F<sup>-</sup>] = 0 – 0.30 mM.

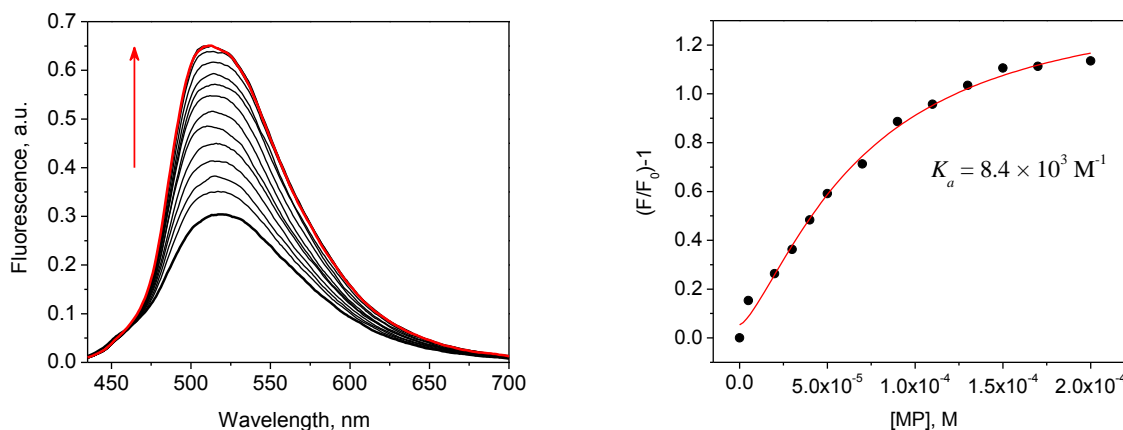

**Fig. S24** Fluorescence spectra of **4** (10 μM) upon the addition of MP in DMSO.  $\lambda_{\text{ex}} = 400$  nm. [MP] = 0 – 0.20 mM.

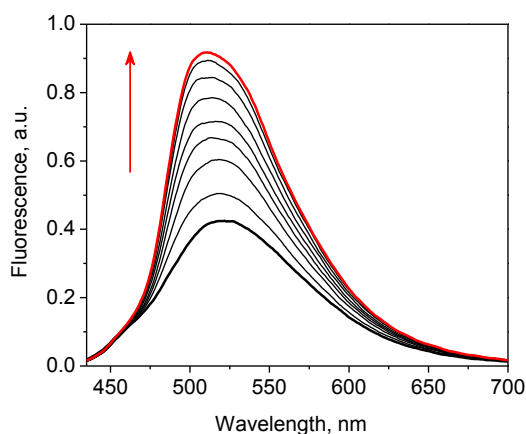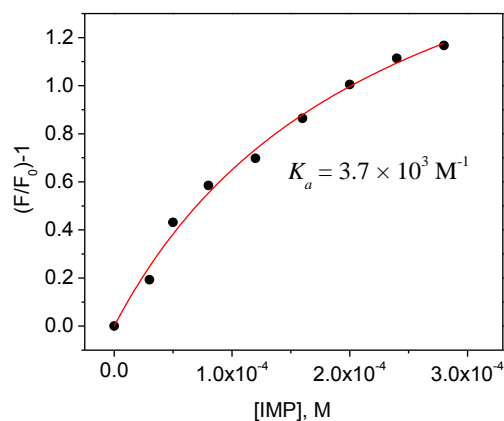

**Fig. S25** Fluorescence spectra of **4** (10 μM) upon the addition of IMP in DMSO.  $\lambda_{\text{ex}} = 400 \text{ nm}$ . [IMP] = 0 – 0.30 mM.

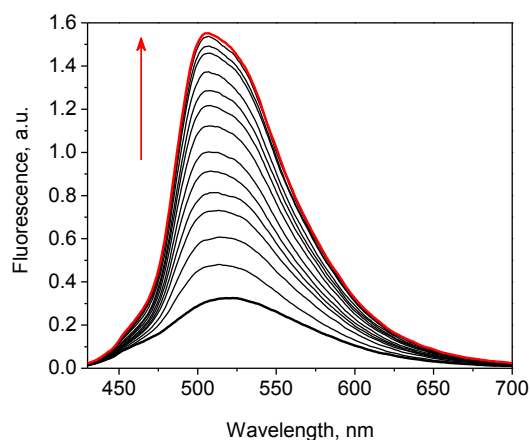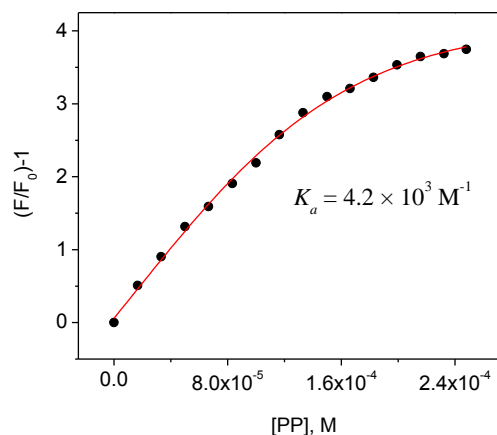

**Fig. S26** Fluorescence spectra of **4** (10 μM) upon the addition of PP in DMSO.  $\lambda_{\text{ex}} = 400 \text{ nm}$ . [PP] = 0 – 0.24 mM.

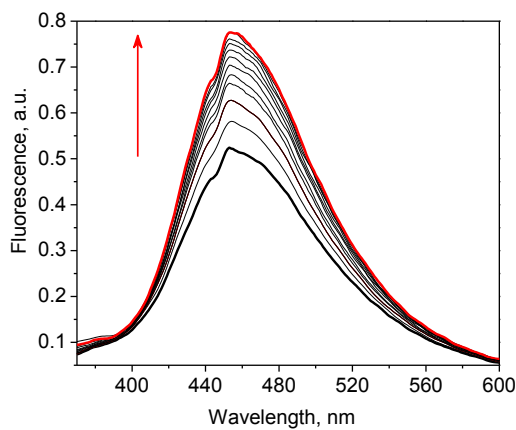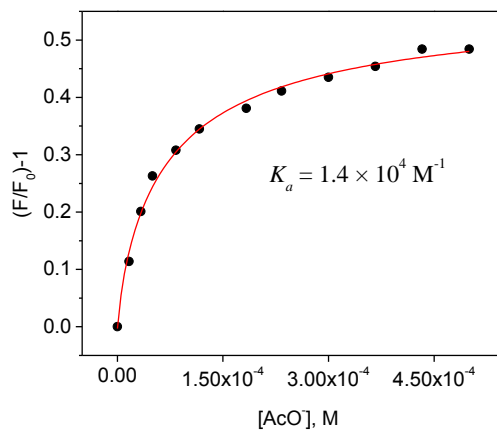

**Fig. S27** Fluorescence spectra of **5** (10 μM) upon the addition of AcO<sup>-</sup> in DMSO.  $\lambda_{\text{ex}} = 330 \text{ nm}$ . [AcO<sup>-</sup>] = 0 – 47 μM.



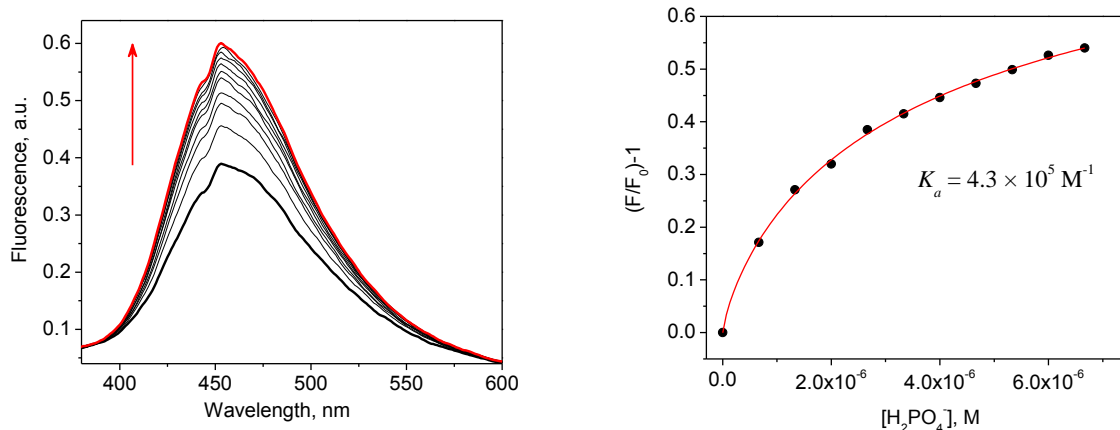

**Fig. S28** Fluorescence spectra of **5** (10 μM) upon the addition of H<sub>2</sub>PO<sub>4</sub><sup>-</sup> in DMSO. λ<sub>ex</sub> = 330 nm. [H<sub>2</sub>PO<sub>4</sub><sup>-</sup>] = 0 – 7 μM.

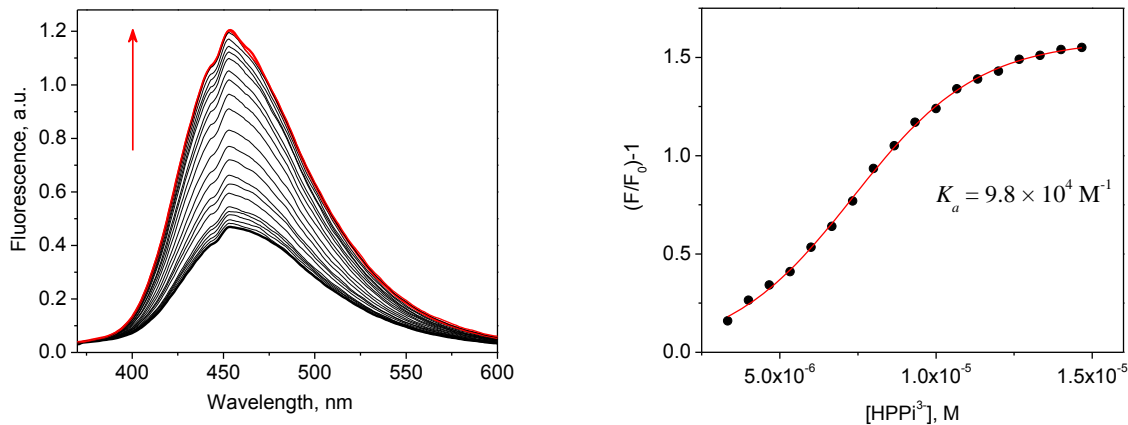

**Fig. S29** Fluorescence spectra of **5** (10 μM) upon the addition of HPPi<sup>3-</sup> in DMSO. λ<sub>ex</sub> = 330 nm. [HPPi<sup>3-</sup>] = 0 – 15 μM.

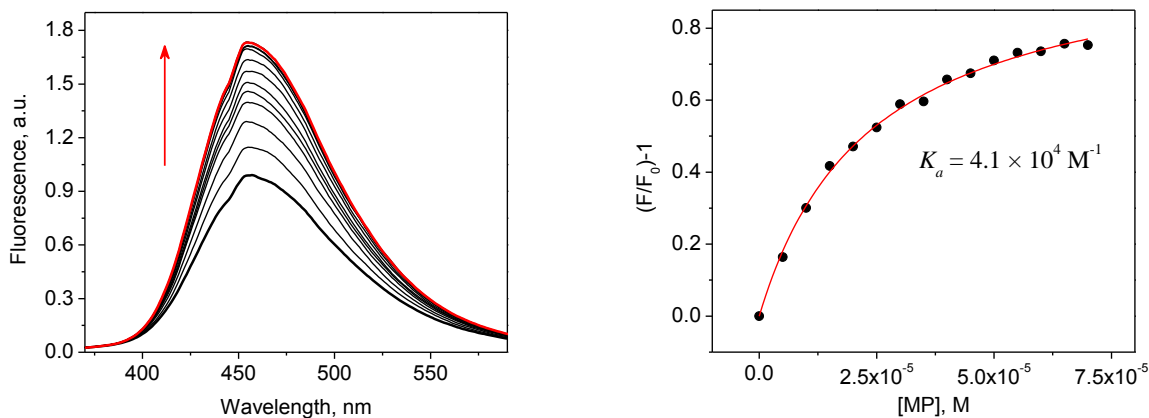

**Fig. S30** Fluorescence spectra of **5** (10 μM) upon the addition of MP in DMSO. λ<sub>ex</sub> = 330 nm. [MP] = 0 – 75 μM.

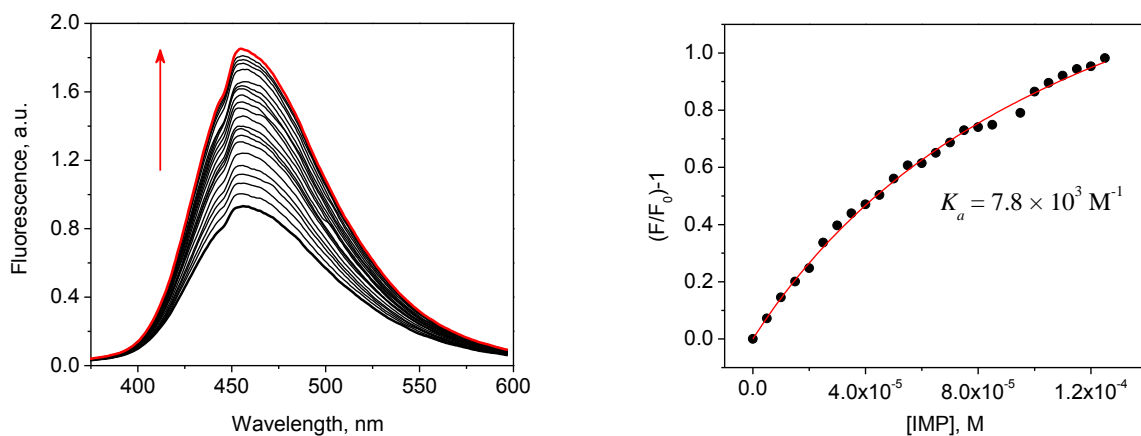

**Fig. S31** Fluorescence spectra of **5** (10 μM) upon the addition of IMP in DMSO.  $\lambda_{\text{ex}} = 330$  nm. [IMP] = 0 – 0.30 mM.

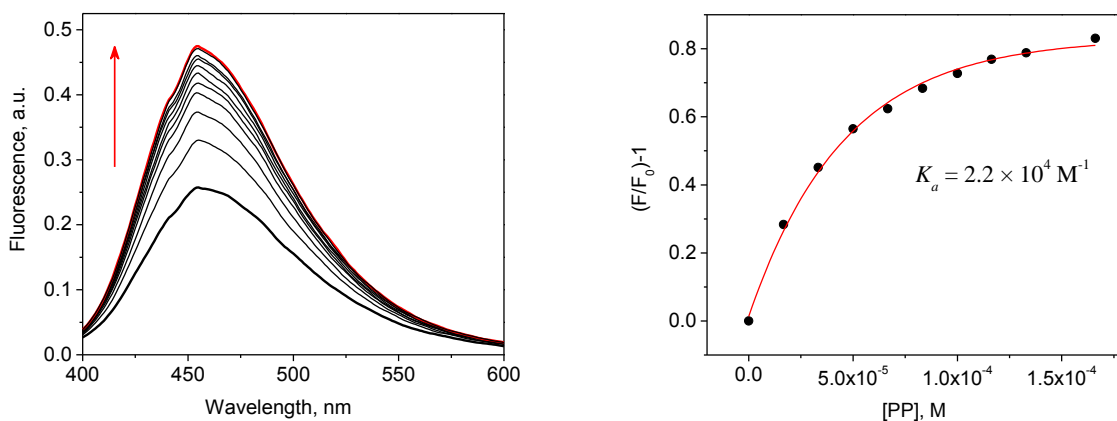

**Fig. S32** Fluorescence spectra of **5** (10 μM) upon the addition of PP in DMSO.  $\lambda_{\text{ex}} = 330$  nm. [IMP] = 0 – 0.16 mM.

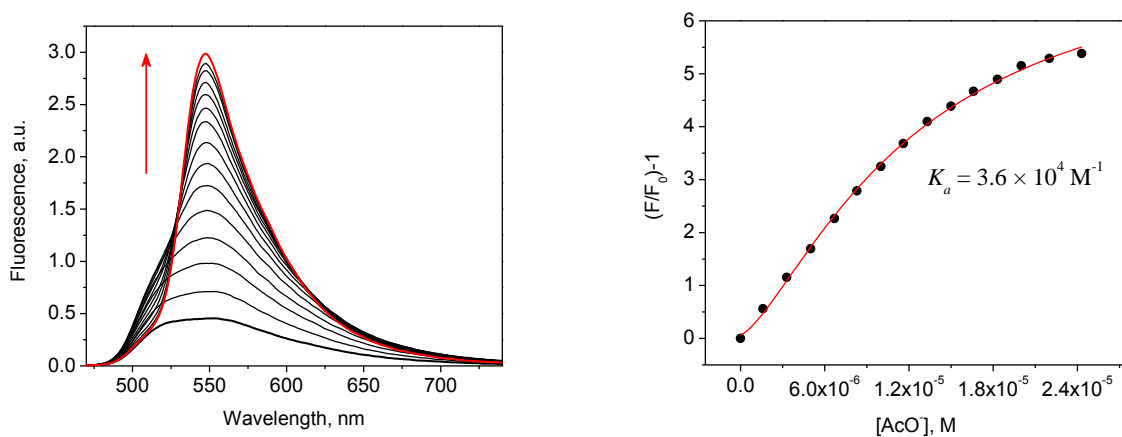

**Fig. S33** Fluorescence spectra of **6** (10 μM) upon the addition of AcO<sup>-</sup> in DMSO.  $\lambda_{\text{ex}} = 450$  nm. [AcO<sup>-</sup>] = 0 – 25 μM.

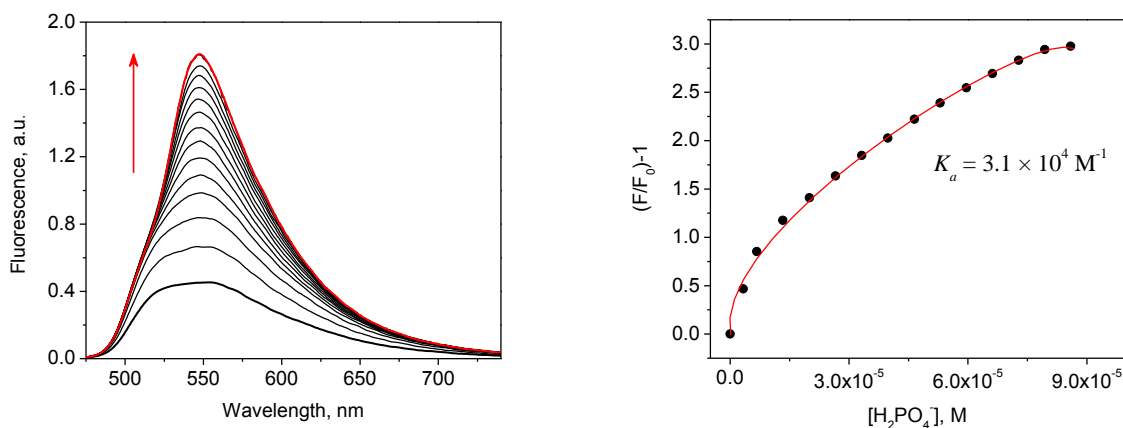

**Fig. S34** Fluorescence spectra of **6** (10 μM) upon the addition of H<sub>2</sub>PO<sub>4</sub><sup>-</sup> in DMSO. λ<sub>ex</sub> = 450 nm. [H<sub>2</sub>PO<sub>4</sub><sup>-</sup>] = 0 – 90 μM.

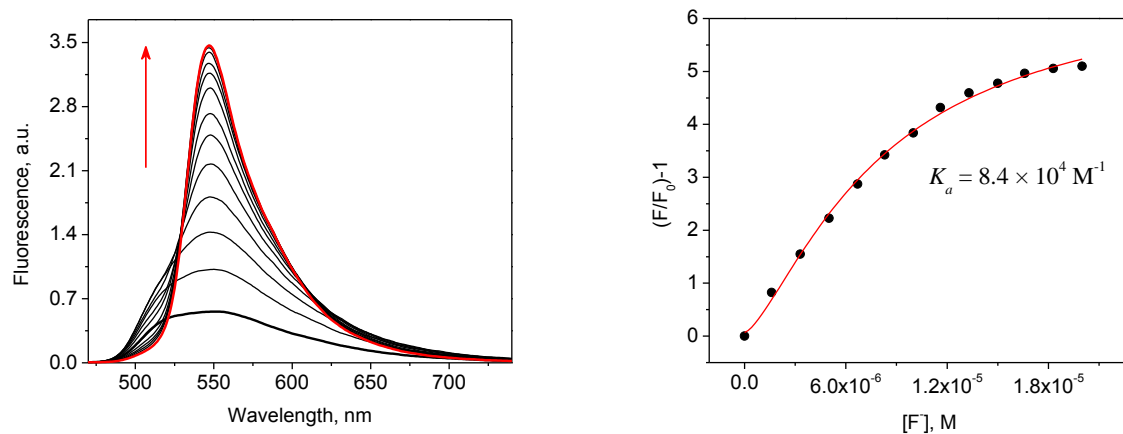

**Fig. S35** Fluorescence spectra of **6** (10 μM) upon the addition of F<sup>-</sup> in DMSO. λ<sub>ex</sub> = 450 nm. [H<sub>2</sub>PO<sub>4</sub><sup>-</sup>] = 0 – 20 μM.

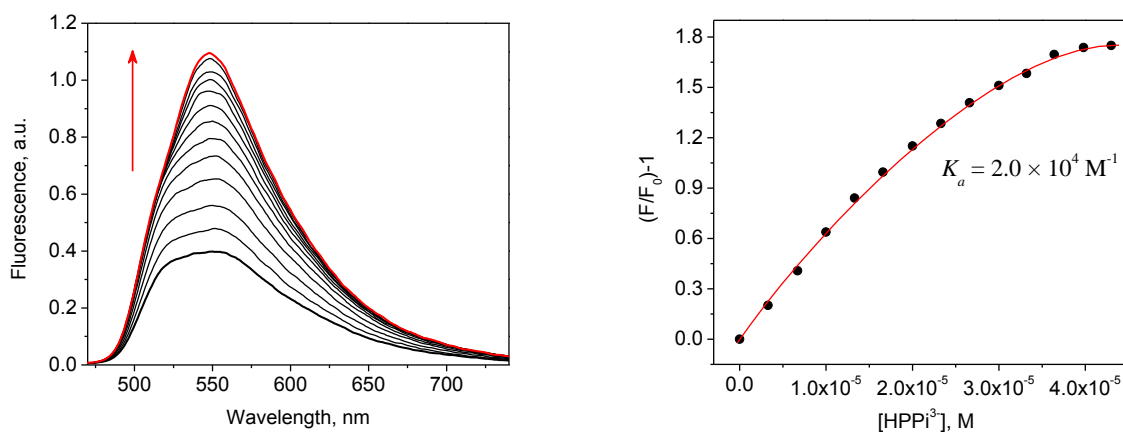

**Fig. S36** Fluorescence spectra of **6** (10 μM) upon the addition of HPPi<sup>3-</sup> in DMSO. λ<sub>ex</sub> = 450 nm. [H<sub>2</sub>PO<sub>4</sub><sup>-</sup>] = 0 – 40 μM.

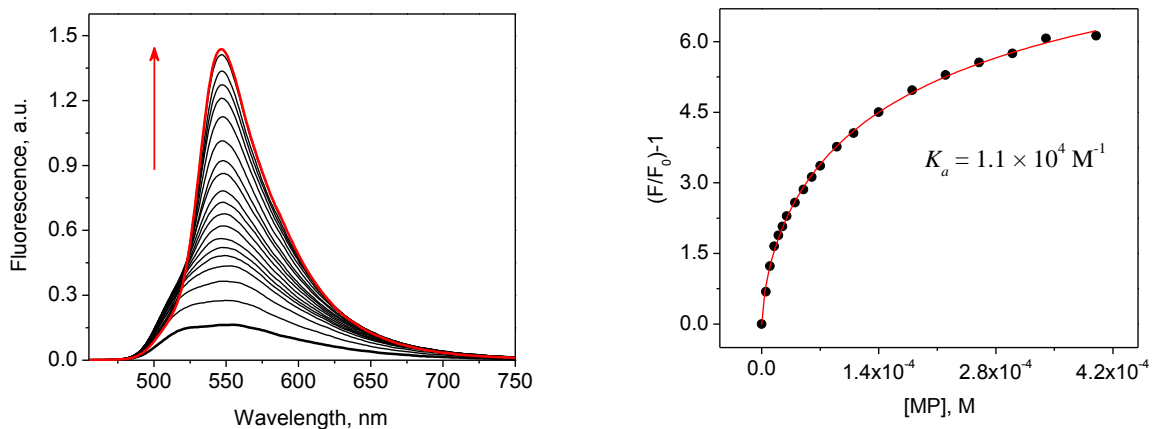

**Fig. S37** Fluorescence spectra of **6** (10 μM) upon the addition of MP in DMSO.  $\lambda_{\text{ex}} = 450 \text{ nm}$ . [MP] = 0 – 0.42 mM.

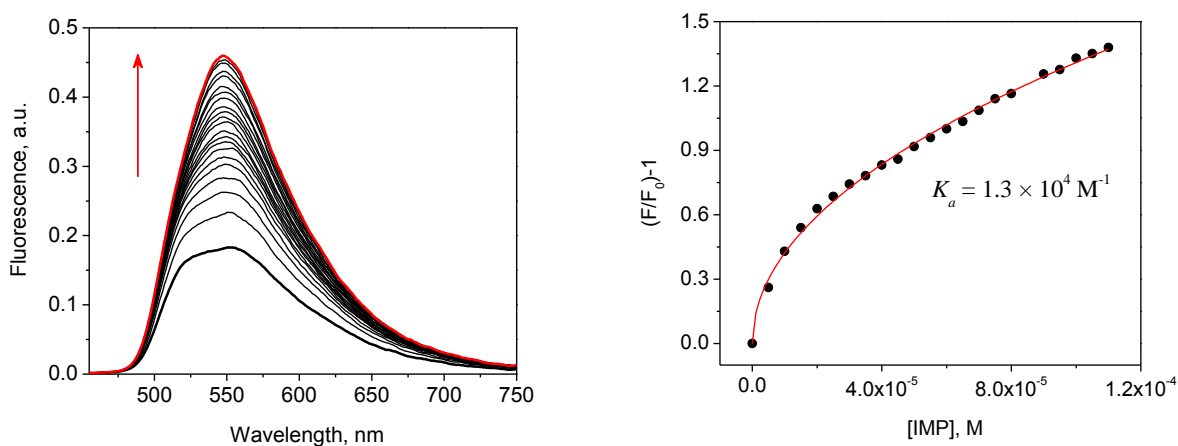

**Fig. S38** Fluorescence spectra of **6** (10 μM) upon the addition of IMP in DMSO.  $\lambda_{\text{ex}} = 450 \text{ nm}$ . [IMP] = 0 – 0.12 mM.

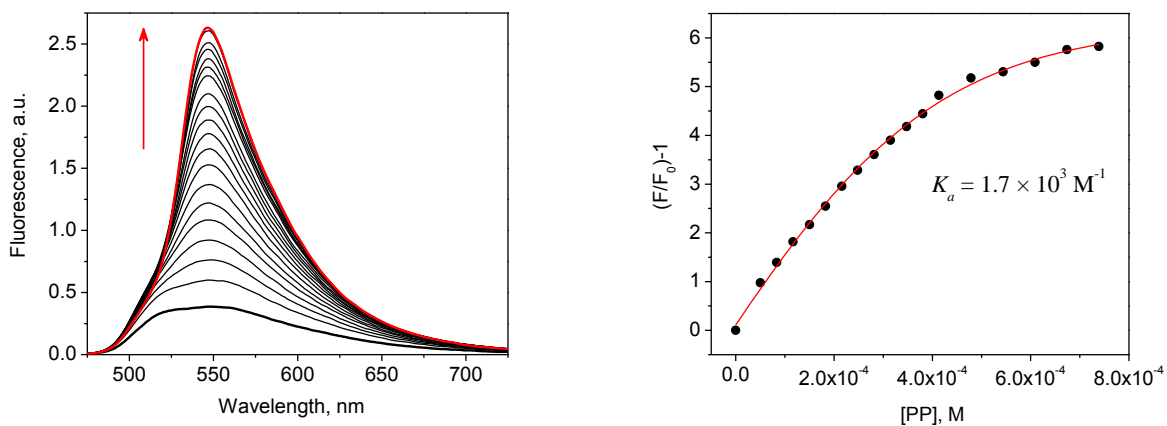

**Fig. S39** Fluorescence spectra of **6** (10 μM) upon the addition of PP in DMSO.  $\lambda_{\text{ex}} = 450 \text{ nm}$ . [PP] = 0 – 0.80 mM.

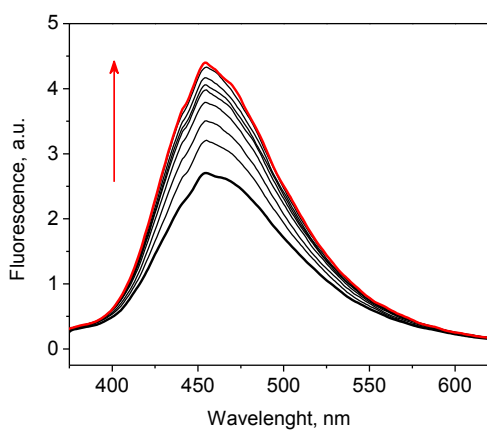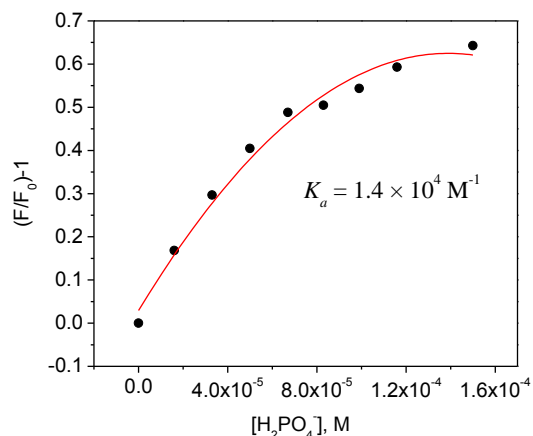

**Fig. S40** Fluorescence spectra of **7** (10  $\mu\text{M}$ ) upon the addition of  $\text{H}_2\text{PO}_4^-$  in DMSO.  $\lambda_{\text{ex}} = 330$  nm.  $[\text{H}_2\text{PO}_4^-] = 0 - 0.16$  mM.

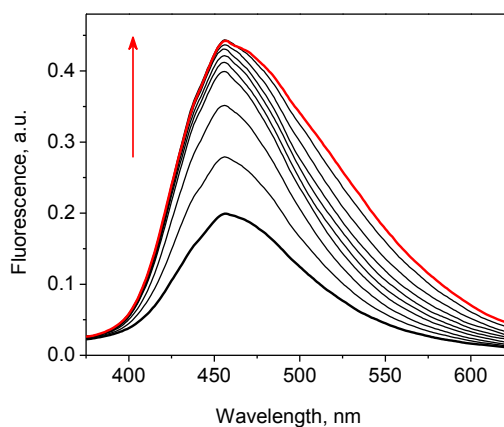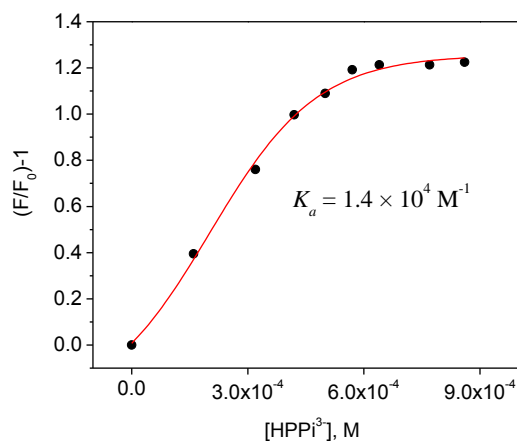

**Fig. S41** Fluorescence spectra of **7** (10  $\mu\text{M}$ ) upon the addition of  $\text{HPPi}^{3-}$  in DMSO.  $\lambda_{\text{ex}} = 330$  nm.  $[\text{HPPi}^{3-}] = 0 - 0.90$  mM.

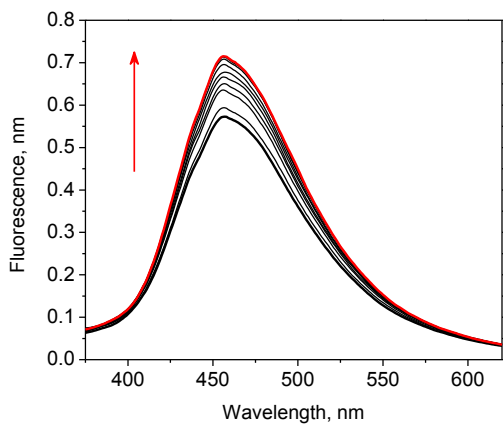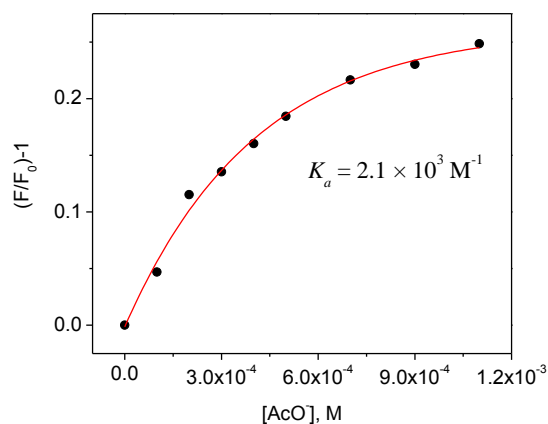

**Fig. S42** Fluorescence spectra of **7** (10  $\mu\text{M}$ ) upon the addition of  $\text{AcO}^-$  in DMSO.  $\lambda_{\text{ex}} = 330$  nm.  $[\text{AcO}^-] = 0 - 1.2$  mM.

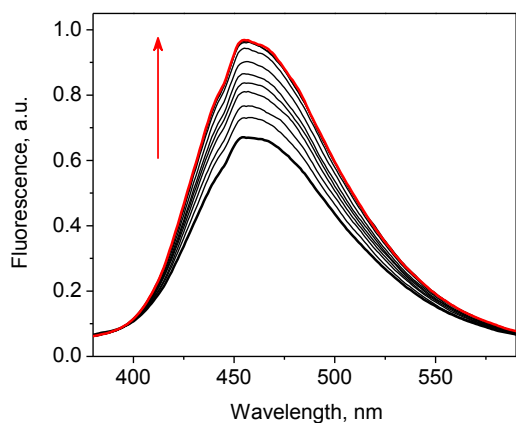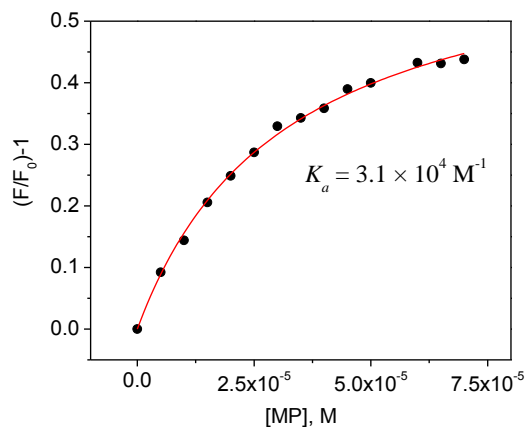

**Fig. S43** Fluorescence spectra of **7** (10  $\mu$ M) upon the addition of MP in DMSO.  $\lambda_{\text{ex}} = 330$  nm. [MP] = 0 – 75  $\mu$ M.

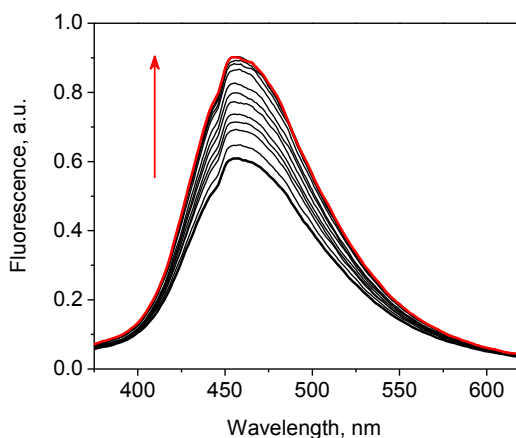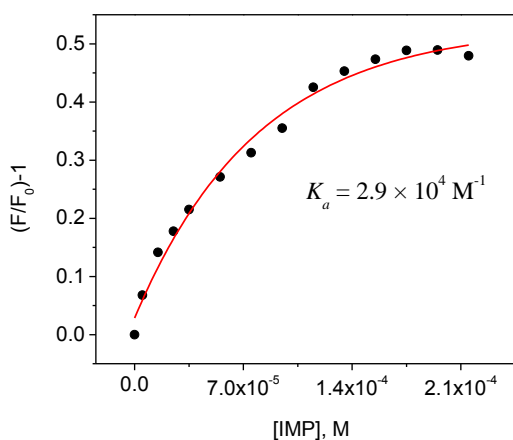

**Fig. S44** Fluorescence spectra of **7** (10  $\mu$ M) upon the addition of IMP in DMSO.  $\lambda_{\text{ex}} = 330$  nm. [IMP] = 0 – 0.21 mM.

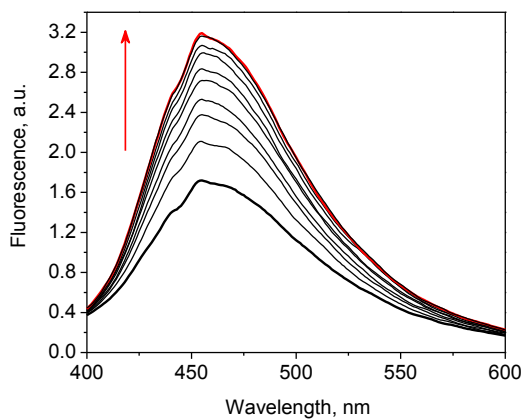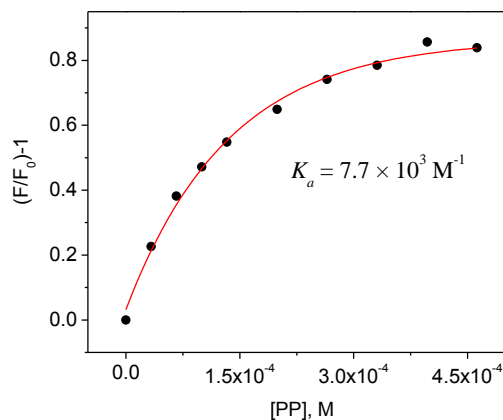

**Fig. S45** Fluorescence spectra of **7** (10  $\mu$ M) upon the addition of PP in DMSO.  $\lambda_{\text{ex}} = 330$  nm. [PP] = 0 – 0.45 mM.

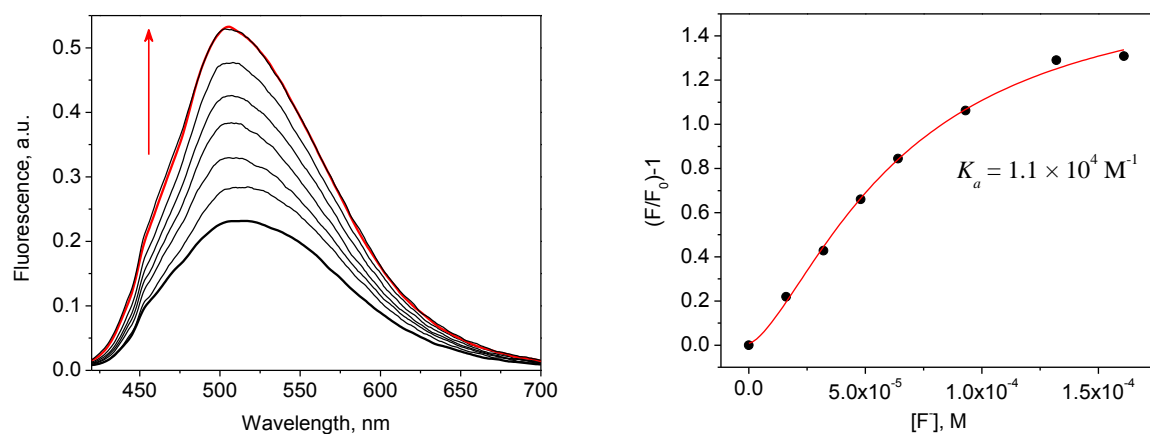

**Fig. S46** Fluorescence spectra of **8** (10 μM) upon the addition of F<sup>-</sup> in DMSO.  $\lambda_{\text{ex}} = 400 \text{ nm}$ . [F<sup>-</sup>] = 0 – 0.15 mM.

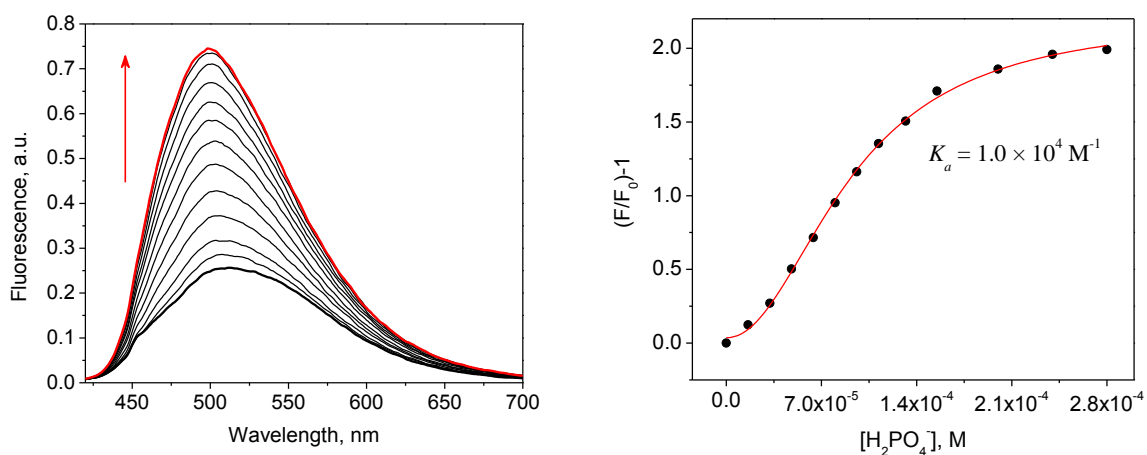

**Fig. S47** Fluorescence spectra of **8** (10 μM) upon the addition of H<sub>2</sub>PO<sub>4</sub><sup>-</sup> in DMSO.  $\lambda_{\text{ex}} = 400 \text{ nm}$ . [H<sub>2</sub>PO<sub>4</sub><sup>-</sup>] = 0 – 0.30 mM.

## Heatmap of Qualitative Microarray

**Table S2** The heatmap of qualitative assay.

|      | S4       | S5       | S6       | S7       | S8       | LUT |
|------|----------|----------|----------|----------|----------|-----|
| Ctrl | 1        | 1        | 1        | 1        | 1        |     |
| Pi   | 0.998372 | 1.330445 | 4.498464 | 1.186065 | 1.003666 |     |
| PPi  | 0.182592 | 2.531575 | 8.297297 | 2.336053 | 0.467342 |     |
| AcO  | 0.966425 | 1.054009 | 8.258106 | 1.065771 | 0.996128 |     |
| Cl   | 0.981003 | 1.012382 | 0.943057 | 1.012299 | 0.98571  |     |
| F    | 0.807329 | 1.101052 | 8.896024 | 1.099552 | 0.984113 |     |
| MP   | 1.002719 | 1.286304 | 1.385011 | 1.132578 | 0.996419 |     |
| IMP  | 1.010773 | 1.524618 | 8.941814 | 1.337976 | 1.033733 |     |

## Linear Discriminant Analysis (LDA)

**Table S3** The jackknifed classification matrix of qualitative assay (sensors 4-8).

| Jackknifed Classification Matrix |     |      |    |     |    |     |    |          |
|----------------------------------|-----|------|----|-----|----|-----|----|----------|
|                                  | AcO | Ctrl | F  | IMP | MP | PPi | Pi | %correct |
| AcO                              | 20  | 0    | 0  | 0   | 0  | 0   | 0  | 100      |
| Ctrl                             | 0   | 20   | 0  | 0   | 0  | 0   | 0  | 100      |
| F                                | 0   | 0    | 20 | 0   | 0  | 0   | 0  | 100      |
| IMP                              | 0   | 0    | 0  | 20  | 0  | 0   | 0  | 100      |
| MP                               | 0   | 0    | 0  | 0   | 20 | 0   | 0  | 100      |
| PPi                              | 0   | 0    | 0  | 0   | 0  | 20  | 0  | 100      |
| Pi                               | 0   | 0    | 0  | 0   | 0  | 0   | 20 | 100      |
| Total                            | 20  | 20   | 20 | 20  | 20 | 20  | 20 | 100      |

## Canonical Scores Plot

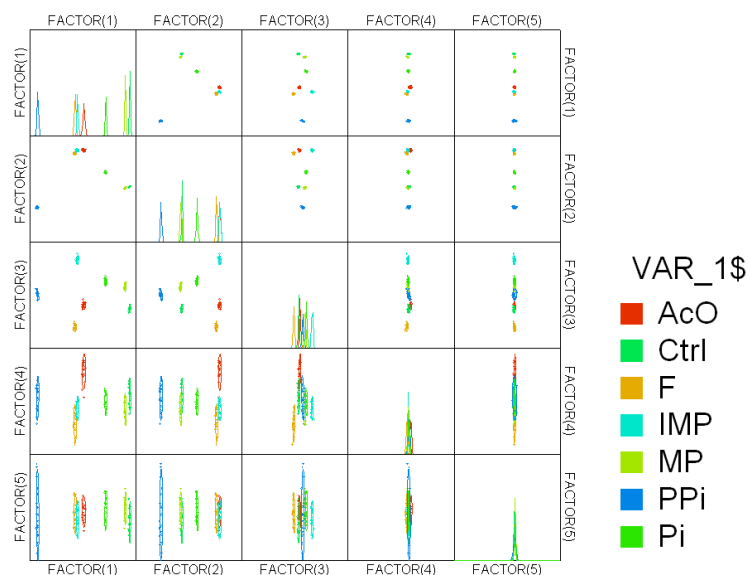

**Fig. S48** The canonical scores plot of qualitative assay (sensors 4-8).



**Table S4** The jackknifed classification matrix of qualitative assay (sensors 4, 5, and 6).

| Jackknifed Classification Matrix |     |    |     |      |    |     |    |          |
|----------------------------------|-----|----|-----|------|----|-----|----|----------|
|                                  | IMP | MP | AcO | Ctrl | F  | PPi | Pi | %correct |
| IMP                              | 20  | 0  | 0   | 0    | 0  | 0   | 0  | 100      |
| MP                               | 0   | 20 | 0   | 0    | 0  | 0   | 0  | 100      |
| AcO                              | 0   | 0  | 20  | 0    | 0  | 0   | 0  | 100      |
| Ctrl                             | 0   | 0  | 0   | 20   | 0  | 0   | 0  | 100      |
| F                                | 0   | 0  | 0   | 0    | 20 | 0   | 0  | 100      |
| PPi                              | 0   | 0  | 0   | 0    | 0  | 20  | 0  | 100      |
| Pi                               | 0   | 0  | 0   | 0    | 0  | 0   | 20 | 100      |
| Total                            | 20  | 20 | 20  | 20   | 20 | 20  | 20 | 100      |

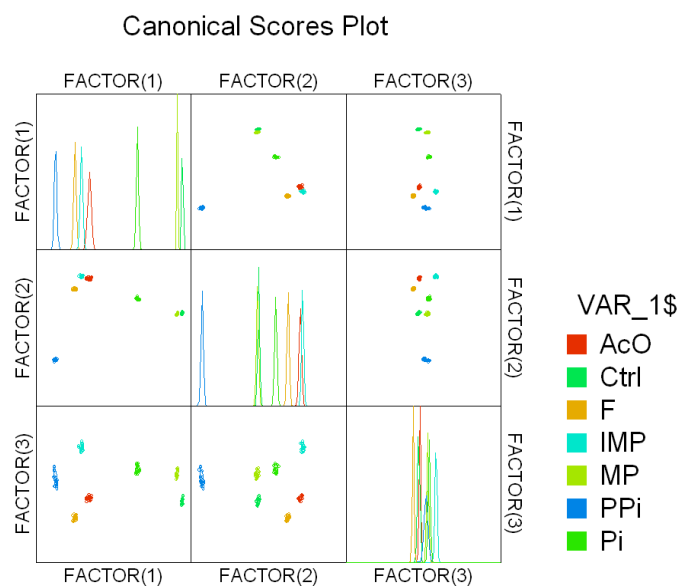

**Fig. S49** The canonical scores plot of qualitative assay (sensors 4, 5, and 6).

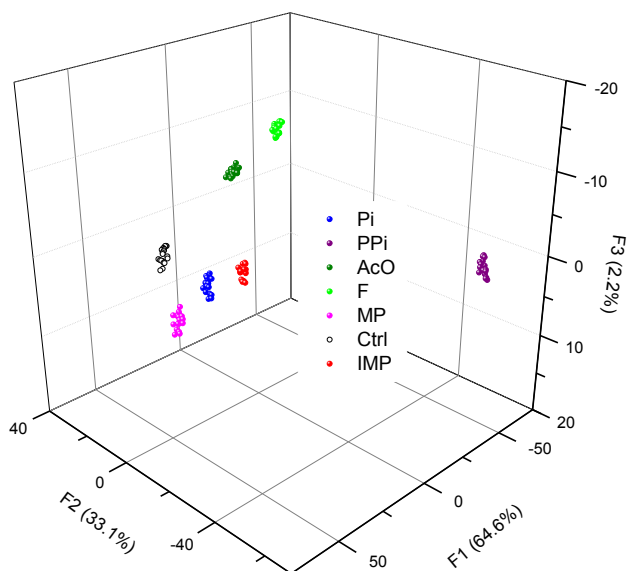

**Fig. S50** The LDA of qualitative assay (sensors 4, 5, and 6).

**Table S5** The jackknifed classification matrix of qualitative assay (sensors **5** and **6**).

| Jackknifed Classification Matrix |     |      |    |     |    |     |    |          |
|----------------------------------|-----|------|----|-----|----|-----|----|----------|
|                                  | AcO | Ctrl | F  | IMP | MP | PPi | Pi | %correct |
| AcO                              | 20  | 0    | 0  | 0   | 0  | 0   | 0  | 100      |
| Ctrl                             | 0   | 20   | 0  | 0   | 0  | 0   | 0  | 100      |
| F                                | 0   | 0    | 20 | 0   | 0  | 0   | 0  | 100      |
| IMP                              | 0   | 0    | 0  | 20  | 0  | 0   | 0  | 100      |
| MP                               | 0   | 0    | 0  | 0   | 20 | 0   | 0  | 100      |
| PPi                              | 0   | 0    | 0  | 0   | 0  | 20  | 0  | 100      |
| Pi                               | 0   | 0    | 0  | 0   | 0  | 0   | 20 | 100      |
| Total                            | 20  | 20   | 20 | 20  | 20 | 20  | 20 | 100      |

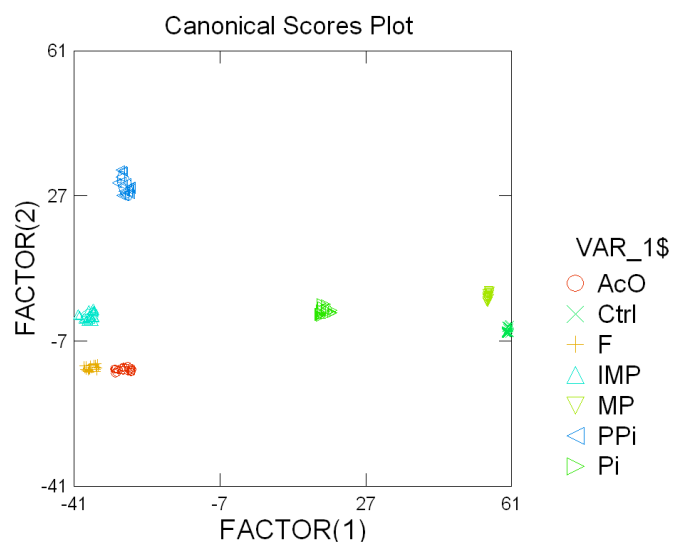

**Fig. S51** The canonical scores plot of qualitative assay (sensors **5** and **6**).

**Table S6** Input data set of the qualitative assay.

| Analytes | Variables |          |          |          |          |
|----------|-----------|----------|----------|----------|----------|
|          | 4         | 5        | 6        | 7        | 9        |
| Ctrl     | 41416.73  | 22846.52 | 12830.00 | 10741.73 | 65944.33 |
| Ctrl     | 40794.00  | 23546.00 | 12306.17 | 11019.75 | 66525.26 |
| Ctrl     | 41446.58  | 22934.00 | 12777.00 | 10925.79 | 64699.79 |
| Ctrl     | 41178.95  | 22827.00 | 12448.00 | 10919.00 | 65857.55 |
| Ctrl     | 41754.00  | 23303.41 | 12522.00 | 10329.43 | 65608.44 |
| Ctrl     | 41404.00  | 23837.79 | 12818.00 | 10496.00 | 63776.85 |
| Ctrl     | 41135.18  | 22782.11 | 12565.15 | 11302.00 | 64219.94 |
| Ctrl     | 41526.00  | 23699.91 | 12815.29 | 10562.00 | 65166.00 |
| Ctrl     | 41684.00  | 24074.00 | 12138.00 | 10435.48 | 64548.00 |
| Ctrl     | 41336.15  | 22539.00 | 12069.76 | 11007.35 | 65260.00 |
| Ctrl     | 40943.16  | 22556.68 | 12765.26 | 10666.00 | 64019.00 |
| Ctrl     | 40671.00  | 22740.00 | 12514.00 | 10885.00 | 65985.00 |
| Ctrl     | 42121.00  | 22941.11 | 12890.82 | 10947.89 | 64517.04 |
| Ctrl     | 40828.00  | 23766.33 | 12465.09 | 11023.00 | 65486.00 |
| Ctrl     | 40821.78  | 22637.19 | 12902.00 | 11056.00 | 64326.00 |
| Ctrl     | 41878.00  | 23189.69 | 12471.95 | 10596.04 | 65745.00 |

|      |          |          |           |          |          |
|------|----------|----------|-----------|----------|----------|
| Ctrl | 41130.00 | 22700.00 | 12823.14  | 10618.84 | 64997.00 |
| Ctrl | 41551.00 | 23468.00 | 12406.23  | 11062.86 | 66421.00 |
| Ctrl | 41141.00 | 22552.00 | 12484.00  | 10993.48 | 66525.26 |
| Ctrl | 42068.39 | 23965.00 | 12279.00  | 10677.00 | 66102.00 |
| Pi   | 42200.80 | 30638.95 | 57680.15  | 12841.36 | 65812.72 |
| Pi   | 41307.93 | 30396.44 | 54512.00  | 12422.00 | 64857.00 |
| Pi   | 41016.00 | 30689.00 | 55019.96  | 13154.51 | 65285.22 |
| Pi   | 41194.05 | 32384.00 | 57168.47  | 12721.00 | 65281.00 |
| Pi   | 41416.77 | 29881.00 | 57198.51  | 12907.00 | 64669.98 |
| Pi   | 41047.00 | 30057.00 | 57147.00  | 13002.99 | 65613.76 |
| Pi   | 40969.32 | 30159.01 | 57443.69  | 12852.47 | 65294.41 |
| Pi   | 41296.00 | 31754.07 | 56979.49  | 12842.00 | 65663.76 |
| Pi   | 41464.00 | 30634.00 | 57508.00  | 13253.00 | 65718.00 |
| Pi   | 41156.00 | 31078.00 | 55991.97  | 12572.00 | 65355.00 |
| Pi   | 40878.62 | 30015.94 | 57552.00  | 12843.00 | 65868.00 |
| Pi   | 41475.22 | 32088.91 | 56046.00  | 12471.63 | 66259.61 |
| Pi   | 41424.83 | 30455.29 | 57218.00  | 12897.93 | 66946.00 |
| Pi   | 41371.00 | 30280.00 | 54631.00  | 12697.91 | 64879.00 |
| Pi   | 41236.38 | 30748.53 | 54447.22  | 12514.00 | 66006.00 |
| Pi   | 40578.31 | 30632.86 | 56087.91  | 12999.96 | 65397.46 |
| Pi   | 41876.00 | 31247.75 | 57226.00  | 13212.00 | 66396.00 |
| Pi   | 41269.00 | 30568.00 | 56955.00  | 13078.00 | 65020.00 |
| Pi   | 40928.00 | 32066.00 | 56099.00  | 12567.60 | 65366.85 |
| Pi   | 41378.00 | 30096.00 | 57511.53  | 12653.46 | 64827.00 |
| PPi  | 7470.00  | 58758.03 | 104792.98 | 25042.00 | 30664.75 |
| PPi  | 7779.25  | 60377.00 | 105473.00 | 24468.35 | 29038.00 |
| PPi  | 7627.11  | 61455.00 | 105018.98 | 24320.28 | 31147.65 |
| PPi  | 7338.00  | 58332.29 | 102935.69 | 25499.83 | 29797.00 |
| PPi  | 7308.00  | 56985.00 | 103064.97 | 25838.28 | 30261.42 |
| PPi  | 7553.59  | 56849.32 | 104450.00 | 24743.00 | 29407.00 |
| PPi  | 8008.66  | 57634.00 | 104613.37 | 24346.47 | 29446.00 |
| PPi  | 7398.62  | 59126.00 | 103839.00 | 24611.00 | 31377.00 |
| PPi  | 7260.00  | 58221.11 | 102786.00 | 25838.00 | 30532.00 |
| PPi  | 7587.32  | 58095.00 | 103126.16 | 25607.61 | 30121.08 |
| PPi  | 7133.00  | 61278.83 | 104849.24 | 25435.36 | 31865.00 |
| PPi  | 7356.00  | 59304.27 | 106222.96 | 25223.83 | 32080.01 |
| PPi  | 7588.70  | 57200.17 | 103315.64 | 25303.40 | 30092.00 |
| PPi  | 8094.04  | 57928.00 | 102875.00 | 25202.00 | 29915.96 |
| PPi  | 7244.00  | 59520.49 | 105144.00 | 26158.00 | 29230.92 |
| PPi  | 7570.42  | 61666.40 | 105491.00 | 24878.32 | 30736.95 |
| PPi  | 7971.00  | 57105.00 | 104352.84 | 25771.00 | 30588.83 |
| PPi  | 7400.68  | 57789.69 | 103400.00 | 25472.00 | 31403.00 |
| PPi  | 7436.68  | 56857.00 | 105137.00 | 25932.97 | 31339.00 |
| PPi  | 7847.14  | 57398.04 | 104147.00 | 25514.00 | 31178.08 |
| AcO  | 39676.31 | 24706.16 | 106111.33 | 11252.17 | 65050.00 |
| AcO  | 39525.00 | 24723.55 | 103495.00 | 11353.57 | 65063.00 |
| AcO  | 40411.00 | 23964.68 | 105570.93 | 11294.76 | 65047.00 |
| AcO  | 40246.22 | 24220.00 | 104015.68 | 11359.65 | 65222.00 |
| AcO  | 39798.08 | 24616.16 | 102402.00 | 11676.00 | 65182.00 |
| AcO  | 39475.00 | 24941.00 | 103978.27 | 11278.00 | 64268.96 |
| AcO  | 39744.18 | 24017.86 | 102870.00 | 12016.71 | 65238.13 |
| AcO  | 39614.00 | 23905.00 | 105886.90 | 11116.00 | 64724.00 |
| AcO  | 39259.11 | 24664.00 | 105839.00 | 11553.32 | 66185.00 |

|     |          |          |           |          |          |
|-----|----------|----------|-----------|----------|----------|
| AcO | 40096.00 | 23852.00 | 102087.37 | 11630.00 | 64250.63 |
| AcO | 39519.61 | 24691.84 | 105922.34 | 11819.00 | 65038.60 |
| AcO | 41080.00 | 24022.00 | 102048.00 | 11255.00 | 65788.00 |
| AcO | 40639.47 | 23862.40 | 102297.03 | 11336.00 | 64805.46 |
| AcO | 39747.18 | 24241.00 | 101949.00 | 11810.88 | 64393.00 |
| AcO | 40603.54 | 24722.52 | 104467.49 | 12009.00 | 64712.82 |
| AcO | 39375.00 | 24899.00 | 102956.00 | 11732.80 | 66856.82 |
| AcO | 40020.00 | 24156.95 | 102010.59 | 11476.00 | 64266.92 |
| AcO | 40189.33 | 24754.00 | 103917.00 | 11621.00 | 64142.00 |
| AcO | 39687.00 | 24478.00 | 102126.74 | 11236.96 | 65706.43 |
| AcO | 40362.00 | 24468.89 | 105236.00 | 11661.82 | 64733.18 |
| F   | 33521.00 | 24765.04 | 110373.10 | 11887.82 | 64154.00 |
| F   | 33628.00 | 26107.11 | 110257.48 | 11567.00 | 63486.32 |
| F   | 33808.82 | 25102.00 | 112867.64 | 12403.99 | 63481.00 |
| F   | 33454.00 | 25288.00 | 111535.00 | 12126.29 | 62887.00 |
| F   | 32925.15 | 25073.00 | 112171.99 | 11542.71 | 66017.00 |
| F   | 33036.00 | 26118.26 | 110729.00 | 11610.00 | 64348.00 |
| F   | 32727.00 | 25205.00 | 112268.01 | 12257.00 | 64278.00 |
| F   | 33342.27 | 26081.00 | 111868.26 | 11595.00 | 62957.88 |
| F   | 33551.00 | 26142.00 | 111071.00 | 12118.24 | 63544.46 |
| F   | 32727.46 | 25237.05 | 111645.84 | 12302.00 | 63896.00 |
| F   | 33816.73 | 26059.51 | 112971.50 | 12316.00 | 64872.69 |
| F   | 33742.60 | 24974.00 | 112514.00 | 11830.47 | 63813.78 |
| F   | 33320.53 | 25363.66 | 110116.00 | 11593.02 | 64192.25 |
| F   | 33247.38 | 26066.00 | 113445.71 | 11503.00 | 63986.00 |
| F   | 32944.92 | 25544.00 | 112238.00 | 11620.18 | 65739.80 |
| F   | 33925.46 | 25070.93 | 110398.00 | 11696.65 | 63907.63 |
| F   | 33976.00 | 25336.00 | 112292.00 | 11785.00 | 66168.00 |
| F   | 32622.00 | 25447.73 | 113301.00 | 11890.00 | 63932.00 |
| F   | 33534.00 | 25544.96 | 110509.29 | 12110.00 | 64959.40 |
| F   | 33673.00 | 25158.04 | 112916.63 | 12039.76 | 64364.00 |
| MP  | 41547.98 | 29243.51 | 17418.00  | 12072.00 | 64149.72 |
| MP  | 40962.00 | 28802.00 | 17509.99  | 12742.00 | 64375.00 |
| MP  | 40977.71 | 30369.66 | 17575.00  | 12242.00 | 63906.00 |
| MP  | 41629.00 | 30725.23 | 17060.77  | 12396.42 | 64909.00 |
| MP  | 40897.81 | 29723.00 | 17318.00  | 12647.36 | 65012.00 |
| MP  | 40872.00 | 30047.33 | 17417.00  | 12061.00 | 64725.00 |
| MP  | 42301.02 | 29617.22 | 17654.00  | 12284.00 | 64671.66 |
| MP  | 41507.03 | 29220.00 | 17443.55  | 12495.00 | 64470.00 |
| MP  | 41639.86 | 29979.00 | 17521.89  | 12437.41 | 63989.36 |
| MP  | 42331.98 | 30554.00 | 17233.00  | 12133.00 | 66793.00 |
| MP  | 41220.40 | 29107.53 | 17573.46  | 12167.46 | 66497.00 |
| MP  | 41186.00 | 29490.00 | 17659.00  | 12041.00 | 64357.07 |
| MP  | 41200.00 | 29239.49 | 17324.55  | 12034.49 | 65153.77 |
| MP  | 41329.00 | 29476.20 | 17139.00  | 12004.00 | 65388.00 |
| MP  | 41090.00 | 29833.00 | 17272.98  | 12322.43 | 65478.57 |
| MP  | 41604.91 | 30936.00 | 17291.00  | 11859.53 | 65629.74 |
| MP  | 41900.00 | 30321.00 | 17218.44  | 12340.43 | 66793.13 |
| MP  | 41415.00 | 30081.58 | 17150.02  | 12070.48 | 64992.00 |
| MP  | 41359.22 | 29825.73 | 17677.59  | 12456.00 | 65006.00 |
| MP  | 42106.00 | 28846.00 | 17583.38  | 12130.47 | 64757.46 |
| IMP | 42051.07 | 35741.00 | 111298.00 | 14426.15 | 66910.00 |
| IMP | 42144.00 | 34926.73 | 111934.00 | 14356.10 | 68286.00 |

|     |          |          |           |          |          |
|-----|----------|----------|-----------|----------|----------|
| IMP | 41993.00 | 34944.00 | 111193.41 | 15004.56 | 66952.61 |
| IMP | 42122.38 | 36418.19 | 112523.76 | 14960.53 | 68592.00 |
| IMP | 41638.00 | 34389.04 | 113006.36 | 14368.00 | 67122.80 |
| IMP | 41548.84 | 35786.03 | 115066.05 | 14488.00 | 67111.00 |
| IMP | 42160.00 | 34980.00 | 113483.04 | 14217.01 | 68517.95 |
| IMP | 42250.95 | 34203.00 | 111231.00 | 14822.00 | 67447.00 |
| IMP | 41909.44 | 36114.00 | 111203.00 | 14204.00 | 67311.34 |
| IMP | 41226.42 | 34487.53 | 112594.00 | 14890.00 | 66698.00 |
| IMP | 41854.00 | 36003.11 | 111266.44 | 14246.00 | 68249.92 |
| IMP | 41133.00 | 34699.59 | 112429.02 | 14385.12 | 67942.00 |
| IMP | 41730.65 | 36213.16 | 111846.74 | 14335.09 | 66904.72 |
| IMP | 41480.00 | 35122.71 | 112678.00 | 14020.87 | 67714.90 |
| IMP | 41953.64 | 34855.00 | 111166.00 | 14467.18 | 66925.10 |
| IMP | 42036.00 | 34697.00 | 112176.37 | 14271.00 | 67406.00 |
| IMP | 41198.00 | 35260.00 | 112098.00 | 14530.00 | 67154.40 |
| IMP | 41565.92 | 35541.00 | 114698.92 | 14228.00 | 68190.00 |
| IMP | 42225.00 | 34863.41 | 113730.00 | 14503.21 | 67823.00 |
| IMP | 41516.00 | 36510.00 | 111374.01 | 14634.00 | 66516.44 |

### Supporting information references

- <sup>1</sup> K. J. Wallace, R. Hanes, E. Anslyn, J. Morey, K. V. Kilway, J. Siegel, *Synthesis*, 2005, 2080-2083.
- <sup>2</sup> G.V. Zyryanov, M.A. Palacios, P. Anzenbacher *Angew. Chem. Int. Ed.*, 2007, **46**, 7849 –7852.
- <sup>3</sup> DENZO-SMN. (1997). Z. Otwinowski and W. Minor, *Methods in Enzymology*, **276**: Macromolecular Crystallography, part A, 307 – 326, C. W. Carter, Jr. and R. M. Sweets, Editors, Academic Press.
- <sup>4</sup> A. Altomare, M.C. Burla, M. Camalli, G. L. Cascarano, C. Giacovazzo, A. Guagliardi, A.G.G. Moliterni, G. Polidori, R. Spagna *J. Appl. Cryst.*, 1999, **32**, 115-119.
- <sup>5</sup> G. M. Sheldrick, (1994). SHELXL97. Program for the Refinement of Crystal Structures. University of Gottingen, Germany.
- <sup>6</sup> International Tables for X-ray Crystallography (1992). Vol. C, Tables 4.2.6.8 and 6.1.1.4, A. J. C. Wilson, Editor, Boston: Kluwer Academic Press.
